# Supplementary material for: SlGID1a Is a Putative Candidate Gene for qtph1.1, a Major-Effect Quantitative Trait Locus Controlling Tomato Plant Height
Source: Front Genet. 2020 Aug 7;11:881. doi: 10.3389/fgene.2020.00881 (PMC7427465; doi:10.3389/fgene.2020.00881)
Supplement: Supplementary file 1 [file Table_1.xlsx]

## Sheet:  Table S1
Supplementary Table 1. General information on the primers used in this study.
Primer Name	Purpose	Forward sequence (5'→3')	Reverse sequence (5'→3')	Note
HP3809	Single marker analysis of plant height QTL	GCAAAACAATCATCAGAAAGAG	CAAATGTCCCAATGCCTATAC	InDel
HP3473	Single marker analysis of plant height QTL	CATCATGGACAGGTTGATCC	CAGATACTGTAGCAGTTGCGA	InDel
HP3547	Single marker analysis of plant height QTL	TGATCAATGTCAATATGAGAAGAG	ATGTCAATGAGTGTGTGTTGG	InDel
HP5551	Single marker analysis of plant height QTL	CATCTATGCATGCTTGGTCAAC	CCGTAGAAGCTTGTCAATCG	InDel
HP2979	Single marker analysis of plant height QTL	CACTCCTTCTGTTGAGTAGGTC	CTCAAGTCAATTAATGTTAAGCATC	InDel
HP805	Single marker analysis of plant height QTL	GAGAGGTAACAATTCTTCATCT	GAAGTGTAAGGCACGAACTC	InDel
HP2007	Single marker analysis of plant height QTL	CAAACGTACGTTGGATAGAAGTC	GCTGATATCTTGGAAGAGCTTG	InDel
HP3799	Mapping of qtph1.1	CTATAAGAAGATCATCATGGTGG	GCTTTTTAGTACTCATGTTGACC	InDel
HP3803	Mapping of qtph1.2	CTCACGTTCAAATTCCACGAG	GTTGGTGACTATTGTGTTCTGAC	InDel
HP3809	Mapping of qtph1.3	GCAAAACAATCATCAGAAAGAG	CAAATGTCCCAATGCCTATAC	InDel
HP3819	Mapping of qtph1.4	GAGATTTGCATTAAGTGTCATATGTA	GACGGAGGGTAAGTTAACAAG	InDel
HP3825	Mapping of qtph1.5	GACGTGATTCAGCGTATCTG	GGAGAGACAAGTTTCTTGGTTG	InDel
HP1703	Mapping of qtph1.6	TGCATTAGATCTTTAACCACCCAT	TATGCAGCAGTTTGTTGACCAC	InDel
W1J2	Mapping of qtph1.7	GAGTGCTTGTGTCTCTTCTGTATTACAAG	GTTGATGATTTAAGACTATGGCTC	dCAPs (HindIII)
W1J4	Mapping of qtph1.8	TTGATTTAGGCTTGAACTTACCTTTATAG	ATACAATTACTAAGAAAGGAGGGAAATTCT	dCAPs (Hpy188I)
W1J26	Mapping of qtph1.9	TGCCCTTGGGATATGGCGTCTTAT	GACCACAAATATGTAGGGTGTAGTTCA	CAPs (HhaI)
W1J28	Mapping of qtph1.10	ATGTTGCCAGCCACGGAGAATC	GATGTGGTGCAGCAATCACTAAAG	dCAPs (TaqI)
W1J22	Mapping of qtph1.11	GGTTCAGATCCAAAAGTGTCA	GATGATTGAGGCGTCCAGACCA	dCAPs (Tsp45I)
W1J4	Mapping of qtph1.12	TTGATTTAGGCTTGAACTTACCTTTATAG	ATACAATTACTAAGAAAGGAGGGAAATTCT	dCAPs (Hpy188I)
W1J11	Mapping of qtph1.13	CGAATTTCCCACTAATTACTTAATACTAA	CCAACAATTCTGCCCTCGACTG	dCAPs (DdeI)
W1J37	Mapping of qtph1.14	GACACCACTTAAACTCACTTT	GTTCACTTCTCCCTTTTC	CAPs (AccI)
W1J13	Mapping of qtph1.15	AAATAGTAAAAGAAACAATCCTAAGTAGA	GGAGAGACATAGGCAGAGCAT	dCAPs (AccI)
W1J19	Mapping of qtph1.16	CTTCAAGTTGTCTTACAATCTTCTCCGTCG	CTCCATCCTCAAAAGAAGGCCGATAGACCC	dCAPs (HpaII)
W1P9	Mapping of qtph1.17	GAACTGGATAAGTAAAAGACAAATA	AGGGTTACTATATTAGAAAGAGAGG	SNP-Sanger sequencing marker
W1G1	Sequencing of the candidate segment	TGGCCCTTAATGTCTCCTT	GAATTATTATGCTCTATCTCTCAC
W1G2	Sequencing of the candidate segment	CATCATGGCAATATTGTTATGCTT	GACATAGCCCACAATCCACAT
W1G3	Sequencing of the candidate segment	TTTTGTGACGGAAGAGTCC	AACGGCGTCCTTTGAGG
W1G4	Sequencing of the candidate segment	ACACCCACATTTAAGAAAACTCCA	ACATCTAACACACACAGCAGAAC
W1G5	Sequencing of the candidate segment	TGAGTGCCTATTTGTGTAGATTTTGG	AAGATTCTTTGGGAACTTGACG
W1G6	Sequencing of the candidate segment	TGGAGATAGCTCTGGTGGTAAT	GTGCATCCCTGAGAAAAGAAAC
W1G7	Sequencing of the candidate segment	GTAGTAGAGGGGGTAAGTCTGGTG	CCTGATTGATTTTGTTGGTTTTG
W1G8	Sequencing of the candidate segment	CTCCCTTCCCCTTTCTATTTA	AACCCTTTTGTCATTTTCGTC
W1G9	Sequencing of the candidate segment	AAGCCTGCTATCAAATGG	TGGGATGGATTCAACAACC
W1G10	Sequencing of the candidate segment	GCACAATCAGAAAGAATTCAGAATCCAATA	GGGAGAAGCTGTACAAAACAGTGGTAGACT
W1G11	Sequencing of the candidate segment	CTGCGAGAAAAGCTACCACCTAAAATAGAG	GAAAGGTAGTGGGTACACTATCCACCAAGT
W1G12	Sequencing of the candidate segment	AGTTTCTGCTCTTGTCCACATCATTCA	AACCCTAGAGTGTCTTTGCTGACGAGTC
W1G13	Sequencing of the candidate segment	TGTGCTGGAGCAGAACACATCTTC	TTGATCGCTATTGTATGAATTAATCACGAATC
W1G14	Sequencing of the candidate segment	AATTAGTAGTAGTAACTTAGATTCGTGGGC	TGATACTATAAGGCTAGCTAGTTATTTCTTT
W1G15	Sequencing of the candidate segment	GGATGTGGTCATTATGATCAAGCACTATTAC	TACAACGCACCATCAATACACATTTCAA
W1G16	Sequencing of the candidate segment	AATGATAAAGGTAATTAAGTAATTGGTATTCAA	ACAATCTTGCCTTCTTCCCAATTATTAGTC
W1G17	Sequencing of the candidate segment	GCCATTAAATCAATGACTCACCTTGTTAGA	TAATTGTTATTGCCAAGATCAAGTCCTTGT
W1G18	Sequencing of the candidate segment	GAATGTGGAGTATTTGGGCTGTGAAGA	GATCAATGTACATTTAATATCGAATTAAGATGTC
W1G19	Sequencing of the candidate segment	TATATGCTTAGCACTACAGATTTACAGACAA	TAGCAATCAGTCTAATGTAGACTTCAAGAA
W1G20	Sequencing of the candidate segment	TTACGGAAGGAAATGCACACTCTTT	ATGCGCAAAATTCATTGAATATTAGTCTT
W1G21	Sequencing of the candidate segment	ATTTAGAGGTTAAGATTATTTTACCTCATTGT	TTGGATGGTACATATAAGACGTTCTCATT
W1G22	Sequencing of the candidate segment	TTTGTTTTATACTAATTCAATCTCGTATTTCACAG	TATTCTATCCGTCTGATATTGTTTGTCAT
W1G23	Sequencing of the candidate segment	TTGATTAATTTTCACGTTAAATTAGATTGC	TTTGTTTGTTTTGCTAGATCTTGCGATAA
W1G24	Sequencing of the candidate segment	GGTTGATGCAATTGGTTAAATTGTAAAGGT	GATGCGACACGTGTGTATCATCTTGTTATT
W1G25	Sequencing of the candidate segment	ATGTTAGCCTCCGTAGTAGAGGGGGTAAG	AATCACCGCCAACTGGACTCTTTCTC
qtph1.1_RT_PCR	RT-PCR for candidate gene	CTGAAGGAACAGTGTGTCGAGAGGGAG	ACACAGATCCAGCTACATGATTGAGGTT
SlCAC	Internal control gene for qRT-PCR	CCTCCGTTGTGATGTAACTGG	ATTGGTGGAAAGTAACATCATCG	Exposito-Rodriguez et al. 2008
SlGID1a	qRT-PCR for gene expression analysis	TGAATCTAAGAGAGTGGTTCCGC	GGCCTATTTCACGATCAATGAGA
SlGID1b1	qRT-PCR for gene expression analysis	CACTAATGAATCTAAGAGGGTGGTTCC	TCAACTGGAATCGAGTTAGCACC
SlGID1b2	qRT-PCR for gene expression analysis	ATGAATCTAAGAGGGTGGTTCC	CCTTCCGGTCTATAAACTCAGC
SlDELLA	qRT-PCR for gene expression analysis	CAGATTCATCAGCAACGAGACC	TGTGAAACCGCAAGAATACCAA	Liu et al. 2016
SlGID2	qRT-PCR for gene expression analysis	GCGGTGTTGTTGAATGAGAATC	GTCTTGTGCAGATCAGCTCCC	Liu et al. 2016
SlKAO	qRT-PCR for gene expression analysis	TGGACTTACACCAAAGGTAGGAA	AAATACATCACTGGACAAGACGG	Zhou et al. 2018
SlGA20ox3	qRT-PCR for gene expression analysis	GACACGTTTATGGCACTATCAAA	TCTGGATAAATTCTTGGATTGTTAGA
SlGA3ox2	qRT-PCR for gene expression analysis	GTAGACCAAAGGAACCCTCAAAT	GCCGAACAGATGAAAGTGCT	Zhou et al. 2018
SlGA2ox2	qRT-PCR for gene expression analysis	AGATCTCTTACAGAGATGGAGTGG	CGATAATAATTTGTTGCCCAAT
SlGAST1	qRT-PCR for gene expression analysis	CAACAACAGAGAAATAACCAAC	TTATACGATGTCTTTGAACACC	Liu et al. 2016
Solyc03g113910	qRT-PCR for gene expression analysis	AAATGTTACACTGAAATGACTACCCA	GCAGCAAGATATATACTGCAATGTAGA
Solyc03g116060	qRT-PCR for gene expression analysis	GTCTGAATTAAGAGGTCATTAGTTG	TAGAAGAAAAGAGTAAGATAACAATAGAC
Solyc11g011210	qRT-PCR for gene expression analysis	GCTAGCTTCTTGTTACTTATCTCAAT	GTTTGTTGCCATAAACTCCTTT
Solyc07g066560	qRT-PCR for gene expression analysis	CGTGTAGCTGATTCCTCCTCTAA	CTCATCACCGACGTAAACAGG
Solyc01g091030	qRT-PCR for gene expression analysis	TGCTCAAACACCGAATCAC	GGTCCAGTTTATGAACTTAGAAAT
Solyc07g063850	qRT-PCR for gene expression analysis	TTTAACAAGTTCTGGTACGTCTG	AGGTCTGGAACAAATTGACTCA
Solyc10g008520	qRT-PCR for gene expression analysis	GCACAGCTTATGGTTGATACAA	TGAGAAAAACATACACAATTAGATATA
Solyc01g110630	qRT-PCR for gene expression analysis	ACATCACTTCTCACTTTAGGATTTA	CACCAGACTTTGTGGTGCTAAG
Solyc04g007690	qRT-PCR for gene expression analysis	GGGGATAATAAAGACGTTTCTCA	TTCTGGTACCGGAATCTTGAACT
Solyc06g008580	qRT-PCR for gene expression analysis	AAATGGCAACAATCTACGAGA	ATTTGTACTTTTGGTGGAGGG
Solyc08g021820	qRT-PCR for gene expression analysis	TGATGATAGCTTCTCCGATATGA	TCTTCCTCAAAATCCTTGTGAC
Reference
Exposito-Rodriguez, M., Borges, A. A., Borges-Perez, A., and Perez, J. A. (2008). Selection of internal control genes for quantitative real-time RT-PCR studies during tomato development process. BMC Plant Biol. 8, 131. doi: 10.1186/1471-2229-8-131
Liu, Q., Guo, X., Chen, G., Zhu, Z., Yin, W., and Hu, Z. (2016). Silencing SlGID2, a putative F-box protein gene, generates a dwarf plant and dark-green leaves in tomato. Plant Physiol. Bioch. 109, 491-501. doi: 10.1016/j.plaphy.2016.10.030
Zhou, S., Hu, Z., Li, F., Yu, X., Naeem, M., Zhang, Y., et al. (2018). Manipulation of plant architecture and ﬂowering time by down-regulation of the GRAS transcription factor SlGRAS26 in Solanum lycopersicum. Plant Sci. 271, 81-93. doi: 10.1016/j.plantsci.2018.03.017

## Sheet:  Table S2
Supplementary Table 2. Markers significantly associated with plant height in the F2 population.
QTL	Marker	Chromosome	Position on SL2.50	SG-7a	Het.	TS-165a	F value	P value	PVE (R2)	d/a
qtph1.1	HP3809	1	88337244	94.3	89.2	74.7	25.49	7.89e-11	0.15	0.48
qtph3.1	HP3473	3	65101614	97.7	88.7	78.7	26.03	4.54e-11	0.16	0.05
qtph5.1	HP3547	5	63575150	84.3	86	94.4	5.14	0.00668	0.04	0.65
qtph9.1	HP5551	9	68007721	79.2	89.4	91	5.93	0.00326	0.05	-0.72
qtph10.1	HP2979	10	62189685	93.2	88	84	4.77	0.00918	0.03	-0.14
qtph11.1	HP805	11	55008071	95.4	84.9	85.6	11.21	2.1e-05	0.05	-1.15
qtph12.1	HP2007	12	5423842	96	87	79.6	18.17	3.94e-08	0.12	-0.1
Data were analyzed by one-way ANOVA
Het. mean plant height value for the heterozygous, R2 variance explained by the associated marker, d/a degree of dominance
a Mean plant height value for the homozygous parental allele

## Sheet:  Table S3
Supplementary Table 3. Progeny test for fine-mapping of the qtph1.1 locus.
Progeny test in spring 2016
Population ID	Parent	HP1583a	HP3803	HP3809	HP3819	HP3825	HP1703	Plant Nb	Ave PHc	SDd	T-test
16N220	15N63-23	1	1	1	1	1	3	7	137.143	11.2165	0.00151046
		3	3	3	3	3	3	7	108	15.1767
16N222	15N63-49	1	1	1	1	1	1	11	139.364	16.4759	6.573e-05
		1	1	1	3	3	3	11	109.727	10.5839
16N228	15N63-197	1	1	1	1	3	3	11	112.091	10.995	0.0419821
		1	3	3	3	3	3	11	96.9909	20.2569
16N231	15N63-277	1	1	1	1	1	1	12	123.333	14.699	0.000961664
		3	3	3	3	3	1	9	101.778	8.71461
16N234	15N63-339	1	1	1	1	1	1	12	105.667	11.4363	0.413164
		1	1	1	1	1	3	12	109.5	11.0741
a Marker score: 1 homozygous for SG-7 alleles; 3 homozygous for TS-165 alleles.
b The number of tomato plants
c Average plant height. unit cm
d Standard Deviation
Progeny test in autumn 2016
Population ID	Parent	HP3809	W1J2	W1J4	W1J26	W1J28	HP3825	Plant N	Ave PH	SD	T-test
16N543	16N222-59	1	1	1	1	1	3	9	140.778	11.8192	3.04075e-06
		1	1	3	3	3	3	8	101	10.81
16N549	16N231-45	1	1	1	1	1	1	10	129.6	18.1059	0.00832218
		3	3	3	3	3	1	10	106.5	16.7282
16N551	16N231-47	1	1	1	1	1	1	8	139.625	12.5463	0.94976
		1	1	1	1	3	3	10	139.2	15.0318
16N552	16N231-60	3	3	3	1	1	1	10	100.4	10.5536	0.963575
		3	3	3	3	3	1	10	100.6	8.66923
Progeny test in spring 2017
Population ID	Parent	W1J2	W1J22	W1J4	W1J11	W1J26	Plant N	Ave PH	SD	T-test
17N323	16N535-2	3	1	1	1	1	10	100.2	6.06996	0.000402209
		3	3	3	3	3	10	85.15	9.15924
17N324	16N539-4	1	1	1	1	1	10	112.2	6.03324	6.01608e-08
		1	3	3	3	3	10	89.3	5.57873
17N436	16N547-31	1	1	1	1	1	10	101.05	13.1792	0.00157853
		1	1	1	3	3	10	82.75	4.75657
17N437	16N547-49	1	1	1	1	1	10	113.7	9.47863	9.31527e-06
		1	1	1	3	3	10	91.9	6.17702
17N439	16N548-15		1	1	1	1	10	91.05	8.89585	8.45247e-06
			1	3	3	3	10	69.35	6.76203
17N440	16N548-27	1	1	1	1	1	8	78.5625	15.6238	0.0121603
		3	3	3	3	3	12	63	9.46044
17N442	16N549-42	1	1	1	1	1	10	109.6	15.3203	0.00882909
		1	1	3	3	3	10	93.2	8.79141
17N443	16N549-58	1	1	1	1	1	10	95.3	9.056	0.0001059
		1	3	3	3	3	10	78	6.37704
Progeny test in autumn 2017
Population ID	Parent	W1J4	W1J37	W1J11	W1J13	W1P9	W1J26	Plant N	Ave PH	SD	T-test
17N975	17N78-67	3	1	1	1	1	1	10	128.3	9.59224	0.00144328
		3	3	3	3	3	3	9	107.111	14.4952
17N976	17N78-126	1	1	1	1	1	1	10	126.6	14.9012	0.00019087
		3	3	3	3	3	1	9	99.1667	9.37417
17N978	17N79-245	1	1	1	1	1	1	10	126.7	15.8609	0.617999
		1	1	1	1	1	3	10	130	13.0894
17N979	17N80-119	1	1	1	1	1	1	9	110.111	5.81903	0.462873
		1	1	1	1	1	3	11	112.364	7.29757
17N993	17N324-17	1	1	1	1	1	1	8	136	5.73212	1.35048e-05
		1	1	3	3	3	3	10	108.1	11.6662
17N994	17N324-41	1	1	1	1	1	1	12	133.667	10.1921	0.000227472
		3	3	3	3	1	1	5	108.2	9.20326
17N1005	17N436-13	1	1	1	1	1	1	9	99.5556	4.15665	2.27229e-07
		1	3	3	3	1	1	10	84.6	3.71782
17N1006	17N436-16	1	1	1	3	3	3	9	86.6667	13.0096	0.582242
		1	3	3	3	3	3	8	83.75	7.12641
17N1007	17N437-6	1	1	1	1	1	1	10	113.05	8.14606	5.7046e-06
		1	3	3	3	3	3	10	93	5.81187
17N1011	17N440-27	1	1	3	3	3	3	8	72.75	5.17549	0.221735
		3	3	3	3	3	3	8	75.875	4.58063
Progeny test in spring 2018
Population ID	Parent	W1J11	W1J13	W1J19	W1P9	Plant N	Ave PH	SD	t test
18N502	17N994-68	1	1	1	1	12	121.5	11.4773	0.191708
		3	1	1	1	12	128.833	14.9656
18N503	17N994-94	1	1	1	1	12	128.333	13.4254	3.40795e-05
		3	3	3	1	12	105.25	7.61727
18N518	17N1005-2	1	1	1	1	10	106.9	20.2783	0.0266972
		3	3	3	1	8	89.25	8.03119
18N531	17N976-20	1	1	1	1	12	96.4167	7.55836	0.000656739
		1	1	3	3	12	84.4583	7.21255
18N532	17N994-38	1	1	1	1	12	122.125	12.8561	1.26553e-05
		3	3	3	1	12	98.4583	7.03387

## Sheet:  Table S4
Supplementary Table 4. Predicted genes in the qtph1.1 region.
Gene Namea	Position on SL2.50ch01	Putative function
Solyc01g098380	88904807-88910487 (- strand)	Dihydrodipicolinate reductase family protein
Solyc01g098390	88916948-88919326 (+ strand)	GID1-like gibberellin receptor, SlGIDa
Solyc01g098400	88922299-88924046 (- strand)	Histidine phosphotransfer protein
a Genes were identified by using the tomato gene model (ITAG release 2.40, SL2.50) in SGN (https://solgenomics.net/)

## Sheet:  Table S5
Supplementray Table 5. Differentially expressed genes in NIL-WT and NIL-qtph1.1 after GA3 treatment.
Gene ID	FC (NIL-qtph1.1-GA3/NIL-WT-GA3)	log2FC(NIL-qtph1.1-GA3/NIL-WT-GA3)	FDR	Function
Solyc11g072310.1	57.5	5.84549	1.15414e-16	Gibberellin 20-oxidase-3
Solyc07g024020.1	10.6812	3.417	2.29854e-09	Protein phosphatase 2C containing protein expressed
Solyc06g075440.1	4.73643	2.2438	8.50179e-08	Peptide transporter
Solyc12g044190.1	4.72727	2.24101	1.19079e-10	Nbs-lrr, resistance protein
Solyc06g073560.2	4.64286	2.21501	8.45919e-05	Isovaleryl-CoA dehydrogenase
Solyc04g007000.1	4.52195	2.17695	3.49614e-05	Ethylene-responsive transcription factor 4
Solyc06g072520.1	4.11163	2.03971	0.000219672	Transcription factor
Solyc03g020040.2	4.06242	2.02234	2.86057e-21	Proteinase inhibitor II
Solyc06g061230.2	3.98292	1.99383	2.21313e-19	Unknown Protein
Solyc03g006450.1	3.9	1.96347	0.00187466	Acyl-CoA thioesterase/ catalytic/ hydrolase acting on ester bonds
Solyc08g077820.2	3.86957	1.95217	0.000151224	Cationic amino acid transporter
Solyc06g073080.2	3.74222	1.9039	1.62696e-05	Flavonol synthase/flavanone 3-hydroxylase
Solyc02g075620.2	3.73611	1.90154	0.000175492	Pectinesterase
Solyc03g119910.2	3.65858	1.87128	2.26199e-13	Gibberellin 3-beta-hydroxylase
Solyc03g020030.2	3.65686	1.87061	5.18101e-12	Proteinase inhibitor II
Solyc01g106910.2	3.34951	1.74395	0.000127687	Unknown Protein
Solyc08g074620.1	3.25118	1.70096	2.38685e-07	Polyphenol oxidase
Solyc06g035760.2	3.23913	1.69561	8.29211e-05	Cytochrome P450
Solyc10g085190.1	3.23294	1.69285	2.49236e-06	Anthocyanidin synthase
Solyc12g008650.1	3.21429	1.6845	3.01557e-09	Inositol oxygenase
Solyc01g097240.2	3.18045	1.66923	0.00122415	Pathogenesis-related protein 4B
Solyc03g007410.2	3.15784	1.65894	1.33418e-06	BHLH transcription factor
Solyc11g022590.1	3.12533	1.64401	0.00562427	Kunitz trypsin inhibitor 4
Solyc01g097280.2	3.12461	1.64368	1.12401e-14	Chitinase
Solyc11g006710.1	3.1	1.63227	0.000166689	Cationic amino acid transporter
Solyc00g174330.2	2.99864	1.58431	2.48095e-06	Pathogenesis related protein PR-1
Solyc05g012970.2	2.92405	1.54797	3.33625e-06	Sulfotransferase family protein
Solyc06g076920.2	2.85042	1.51117	6.70914e-05	Undecaprenyl pyrophosphate synthase
Solyc01g105890.2	2.84242	1.50712	0.000149986	(E)-beta-ocimene synthase
Solyc03g114530.2	2.83878	1.50527	3.62188e-07	Strictosidine synthase family protein
Solyc06g062370.2	2.76923	1.46949	0.0112096	Acid phosphatase
Solyc01g080790.2	2.75705	1.46313	0.00122935	PBSP domain-containing protein
Solyc04g055260.2	2.75117	1.46005	0.00525176	Carboxyl methyltransferase
Solyc07g005100.2	2.73288	1.45042	5.37927e-06	Chitinase-like protein
Solyc07g062480.1	2.70142	1.43372	6.09151e-08	S-locus glycoprotein
Solyc10g083890.1	2.6886	1.42685	0.00319846	Carbonic anhydrase family protein
Solyc02g076930.1	2.675	1.41954	0.0217337	Armadillo/beta-catenin repeat family protein
Solyc01g087590.2	2.64671	1.4042	0.00112181	Polyamine oxidase
Solyc03g034390.1	2.6408	1.40098	0.00326835	Lipid transfer protein
Solyc03g034380.1	2.6268	1.3933	0.00822533	Lipid transfer protein
Solyc07g062490.1	2.62392	1.39172	1.43965e-08	S-locus-specific glycoprotein
Solyc12g039070.1	2.61593	1.38732	8.56682e-10	Strictosidine synthase family protein
Solyc02g089770.2	2.57664	1.36549	0.0279069	Dihydroflavonol-4-reductase
Solyc01g088300.2	2.56107	1.35675	2.06508e-05	Germin-like protein 6
Solyc07g066560.1	2.54769	1.34919	0.0147978	Auxin responsive SAUR protein
Solyc03g114560.2	2.54242	1.3462	1.60638e-08	Strictosidine synthase family protein
Solyc10g011950.1	2.53982	1.34473	0.0273351	Unknown Protein
Solyc09g084470.2	2.53827	1.34385	0.000291612	Proteinase inhibitor I
Solyc01g107790.2	2.5291	1.33862	0.0147237	LRR receptor-like serine/threonine-protein kinase, RLP
Solyc09g006010.2	2.5271	1.33748	1.67616e-07	Pathogenesis related protein PR-1
Solyc02g092490.2	2.52402	1.33572	0.0079261	Acetyltransferase-like protein
Solyc08g080590.2	2.51809	1.33233	7.66019e-12	Osmotin 81
Solyc09g074270.2	2.5037	1.32406	0.00063575	Acetylesterase
Solyc10g017510.2	2.46067	1.29905	0.00246489	Cytochrome P450
Solyc01g091700.2	2.45855	1.29781	0.00026858	F-box protein PP2-B1
Solyc03g006490.2	2.44547	1.29011	3.72101e-10	Aluminum-induced protein-like
Solyc10g005500.2	2.44275	1.28851	0.000829998	Cation diffusion facilitator 9
Solyc12g013700.1	2.44073	1.28732	0.00129324	Aluminum-induced protein-like protein
Solyc01g079620.2	2.43939	1.28652	0.00391402	Myb 12 transcription factor
Solyc07g032080.2	2.43269	1.28255	0.00866915	V-type proton ATPase subunit a
Solyc09g092760.2	2.4273	1.27936	2.23819e-05	Glycine-rich protein
Solyc07g053900.2	2.41927	1.27457	0.00566878	Plant-specific domain TIGR01615 family protein
Solyc06g006020.1	2.40152	1.26394	0.0254384	Receptor like kinase, RLK
Solyc07g054280.1	2.39953	1.26275	0.00319029	Aromatic amino acid decarboxylase
Solyc01g095630.2	2.37826	1.24991	8.70782e-06	WRKY transcription factor
Solyc10g080870.2	2.37731	1.24933	8.06184e-05	Cytochrome P450
Solyc08g066880.2	2.375	1.24793	1.53807e-10	5&apos-methylthioadenosine/S-adenosylhomocysteine nucleosidase
Solyc05g005570.2	2.3743	1.2475	0.0219975	BURP domain-containing protein
Solyc03g114180.2	2.36275	1.24046	1.05428e-05	UDP-glucosyltransferase HvUGT5876
Solyc04g081760.2	2.36232	1.2402	0.00163371	GDSL esterase/lipase At3g43570
Solyc10g074440.1	2.35317	1.23461	1.28755e-10	Endochitinase (Chitinase)
Solyc10g079860.1	2.35043	1.23292	1.65253e-12	Beta-1 3-glucanase
Solyc01g005720.2	2.34579	1.23008	0.0425727	LRR receptor-like serine/threonine-protein kinase, RLP
Solyc05g013450.2	2.34382	1.22886	1.95808e-09	Mate efflux family protein
Solyc06g075480.2	2.33872	1.22572	4.71187e-10	Nitrate transporter
Solyc10g055800.1	2.33493	1.22338	7.98535e-10	Chitinase
Solyc01g091030.2	2.32979	1.2202	0.000552684	Auxin-responsive family protein
Solyc09g072750.2	2.3256	1.2176	3.53257e-12	Unknown Protein
Solyc04g071820.2	2.3252	1.21736	0.0407651	Cytochrome P450
Solyc06g059930.2	2.30612	1.20547	0.000669708	Sesquiterpene synthase 1
Solyc02g092420.2	2.3012	1.20239	0.0359805	Os07g0587200 protein
Solyc04g074000.2	2.29703	1.19977	0.00505254	Receptor like kinase, RLK
Solyc08g014190.2	2.29126	1.19614	0.00521561	Cytochrome P450
Solyc06g007610.2	2.28889	1.19465	0.0118126	Early tobacco anther 1
Solyc03g005910.2	2.271	1.18332	0.00227595	GDSL esterase/lipase At1g29670
Solyc08g074630.1	2.26082	1.17684	7.41232e-10	Polyphenol oxidase
Solyc09g092720.2	2.25244	1.17149	0.000690678	Unknown Protein
Solyc02g065230.2	2.25091	1.17051	0.00263226	Cytochrome P450
Solyc04g050570.2	2.24708	1.16805	0.0273144	GDSL esterase/lipase At5g33370
Solyc03g116610.2	2.24451	1.1664	0.0182794	Ethylene-responsive transcription factor 7
Solyc06g007960.2	2.23077	1.15754	0.0319115	O-methyltransferase
Solyc04g008900.2	2.21603	1.14798	2.44754e-11	Fgenesh protein 60
Solyc03g120690.2	2.2123	1.14555	0.0155432	Dynein light chain 1 cytoplasmic
Solyc03g031730.2	2.19014	1.13102	4.2874e-22	Beta-glucosidase 47
Solyc03g095770.2	2.18966	1.1307	0.0390971	WRKY transcription factor 6
Solyc09g005940.2	2.18159	1.12538	0.000273541	Fatty acyl coA reductase
Solyc01g087150.2	2.17628	1.12187	0.00356045	Mate efflux family protein
Solyc08g007240.2	2.1759	1.12161	8.66128e-17	Hydrolase NUDIX family protein
Solyc06g008870.2	2.16529	1.11456	0.000690678	GID1-like gibberellin receptor
Solyc06g062390.2	2.1586	1.1101	0.0358567	Acid phosphatase
Solyc01g014320.2	2.15301	1.10635	0.0447677	S-adenosyl-L-methionine salicylic acid carboxyl methyltransferase
Solyc03g098730.1	2.14537	1.10122	0.0387693	Kunitz trypsin inhibitor
Solyc07g006870.2	2.14182	1.09884	0.0215863	Xyloglucan endotransglucosylase/hydrolase 8
Solyc06g053730.1	2.13758	1.09598	0.0104815	Serine/threonine protein kinase
Solyc09g092710.2	2.13147	1.09185	4.33752e-09	Glycine rich protein
Solyc12g042760.1	2.12322	1.08626	0.00690662	LRR receptor-like serine/threonine-protein kinase, RLP
Solyc09g015770.2	2.12302	1.08612	5.06197e-07	WRKY transcription factor 6
Solyc12g094650.1	2.11232	1.07883	0.000364399	Genomic DNA chromosome 5 P1 clone MFC19
Solyc04g064530.1	2.1119	1.07854	0.0155691	Unknown Protein
Solyc07g008710.2	2.1083	1.07608	0.00034834	Major latex-like protein
Solyc11g068970.1	2.10389	1.07306	0.0282933	Aluminum-activated malate transporter
Solyc10g055810.1	2.10174	1.07158	5.29234e-14	Endochitinase (Chitinase)
Solyc09g092110.2	2.09785	1.06891	3.30654e-05	Light regulated protein-like protein
Solyc08g066890.2	2.0959	1.06757	0.000720559	Unknown Protein
Solyc07g054630.2	2.09524	1.06711	0.0109968	B3 domain-containing protein Os11g0197600
Solyc01g105450.2	2.08602	1.06075	0.00180526	ABC transporter G family member 11
Solyc09g090500.2	2.08373	1.05917	0.00108571	Cyclopropane-fatty-acyl-phospholipid synthase
Solyc12g096480.1	2.08324	1.05883	0.00929403	GDU1
Solyc03g113710.2	2.08271	1.05846	0.033729	Formin 3
Solyc09g082870.1	2.07571	1.0536	0.0252872	Calcium-transporting ATPase 1
Solyc08g007060.2	2.06362	1.04518	6.14112e-14	Peptide transporter-like protein
Solyc06g062550.2	2.05077	1.03617	0.019558	Phosphatase
Solyc11g011580.1	2.04911	1.035	0.0317058	FIP1
Solyc02g080220.2	2.04397	1.03137	4.95199e-08	Pectinesterase
Solyc05g055990.2	2.03979	1.02842	0.000281301	Aquaporin 2
Solyc01g021600.2	2.03518	1.02515	0.0439317	Disease resistance response protein
Solyc02g082930.2	2.03493	1.02498	1.54383e-10	Endochitinase (Chitinase)
Solyc02g071710.2	2.03122	1.02234	2.54436e-06	GDSL esterase/lipase At1g29670
Solyc07g062980.2	2.0208	1.01493	0.0371204	Squamosa promoter binding-like protein
Solyc01g096740.2	2.01707	1.01226	0.00249838	Transporter major facilitator family
Solyc01g111610.2	2.00889	1.0064	0.004324	Protein binding protein
Solyc01g066850.2	2.00533	1.00384	0.0394966	Nodulin MtN21 family protein
Solyc05g013010.2	2.00269	1.00194	0.000130903	Sulfotransferase family protein
Solyc06g066280.2	1.99654	0.997502	0.0312299	Cytochrome P450
Solyc07g065130.2	1.99605	0.997146	0.0231255	Calcium-binding protein 39
Solyc05g052050.1	1.97753	0.983698	0.0417138	Ethylene responsive transcription factor 1a
Solyc10g007870.2	1.97497	0.981832	0.000168676	Tumor-related protein
Solyc09g062970.1	1.97372	0.980918	0.0361213	Unknown Protein
Solyc08g082590.2	1.97078	0.978766	0.0475518	Glutaredoxin family protein
Solyc11g020670.1	1.96879	0.977309	0.0201476	TCP family transcription factor
Solyc08g079430.2	1.96384	0.973679	1.86062e-07	Primary amine oxidase
Solyc06g084620.1	1.96341	0.973365	0.0395508	Pectinesterase
Solyc01g091180.2	1.96257	0.972742	0.00544461	Peptide transporter-like protein
Solyc10g055740.1	1.96098	0.971572	0.019493	Lysine/histidine transporter
Solyc03g044100.2	1.9606	0.971294	0.000161897	Peroxidase 5
Solyc08g068700.1	1.95723	0.968816	1.71979e-08	N-acetyltransferase
Solyc08g005630.2	1.95709	0.96871	0.000811149	Glucose-methanol-choline oxidoreductase
Solyc04g071030.1	1.95613	0.968002	0.0358567	U-box domain-containing protein
Solyc09g072770.1	1.94815	0.962103	0.0113038	mRNA clone RAFL22-93-M12
Solyc11g006230.1	1.94555	0.960177	0.000242016	Calcium-responsive transactivator
Solyc07g038160.2	1.94051	0.956436	0.00304047	GATA transcription factor 20
Solyc12g100180.1	1.94009	0.956125	0.00100925	ATP-binding cassette transporter
Solyc06g071810.1	1.93704	0.953852	0.0194962	Receptor like kinase, RLK
Solyc01g087710.2	1.93316	0.950963	0.0108031	Uncharacterized membrane protein
Solyc07g009340.2	1.93316	0.950959	0.00125259	Ferric-chelate reductase 1
Solyc06g075550.2	1.92414	0.944212	0.000946626	Serine/threonine kinase
Solyc06g053870.2	1.91293	0.935783	0.0304684	Fatty acid elongase 3-ketoacyl-CoA synthase
Solyc06g064820.2	1.91115	0.934438	0.000862599	GDSL esterase/lipase At1g71691
Solyc07g063850.2	1.89351	0.921065	0.00539416	Indole-3-acetic acid-amido synthetase GH3.8
Solyc06g036170.1	1.89336	0.920946	0.00453779	Scarecrow-like 1 transcription factor
Solyc09g011560.2	1.8871	0.916168	0.0425727	Glutathione S-transferase-like protein
Solyc04g010250.2	1.88304	0.913064	0.00473471	Lipase-like protein
Solyc03g026040.2	1.8764	0.907971	3.42858e-07	Receptor like kinase, RLK
Solyc04g015030.2	1.87449	0.906501	1.16603e-08	Metal ion binding protein
Solyc05g009610.1	1.86619	0.900097	0.00159694	Acetyl esterase
Solyc08g068670.2	1.85406	0.89069	0.0342773	Decarboxylase family protein
Solyc04g064610.2	1.84764	0.885683	3.44341e-07	RAG1-activating protein 1 homolog
Solyc02g092750.2	1.8458	0.88425	0.0121472	Phosphatase 2C family protein
Solyc07g045510.2	1.84106	0.880536	0.034455	Pentatricopeptide repeat-containing protein
Solyc07g007760.2	1.84047	0.880071	3.8995e-23	Defensin protein
Solyc05g007470.2	1.84014	0.879812	0.0224699	AAA-ATPase
Solyc03g098780.1	1.83245	0.873777	0.0101664	Kunitz-type protease inhibitor
Solyc05g055290.2	1.82905	0.871098	2.75564e-05	Hydrolase alpha/beta fold family protein
Solyc06g061280.2	1.82724	0.869663	0.0438549	Cinnamoyl-CoA reductase-like protein
Solyc10g080960.1	1.81904	0.863176	0.0234519	Transcription factor
Solyc07g066350.1	1.81325	0.85858	0.0267087	Unknown Protein
Solyc04g078140.2	1.81286	0.858269	0.00399989	Cytochrome B5
Solyc10g081570.1	1.8009	0.84872	0.00432099	KED
Solyc09g014970.2	1.79399	0.84317	1.14165e-07	Alpha-hydroxynitrile lyase
Solyc02g089620.2	1.79391	0.843108	4.95386e-21	Proline dehydrogenase
Solyc12g087940.1	1.78745	0.837902	3.01543e-08	Aspartic proteinase nepenthesin-1
Solyc10g054440.1	1.78736	0.837827	1.006e-09	Arginine decarboxylase
Solyc09g018280.1	1.78718	0.837682	1.35377e-06	Calcium/calmodulin-dependent protein kinase type 1
Solyc07g006570.2	1.78522	0.836103	0.00302074	S8-RNase
Solyc07g054310.1	1.78516	0.83605	0.00157663	Gty37 protein
Solyc01g090560.2	1.78324	0.834498	0.000127687	Ethylene-responsive transcription factor 4
Solyc02g065220.2	1.77358	0.826668	0.00108459	Cytochrome P450
Solyc07g061750.2	1.77243	0.825725	0.00598658	Ankyrin repeat family protein-like
Solyc02g090400.2	1.76735	0.821592	0.000161897	Myb family transcription factor
Solyc08g065420.2	1.76259	0.817699	8.92681e-09	BEL1-like homeodomain protein 3
Solyc09g097770.2	1.76025	0.81578	1.66842e-08	Cell wall protein
Solyc09g018020.2	1.75657	0.812763	0.0187486	Expansin
Solyc12g006300.1	1.74815	0.805827	0.0489117	WD-repeat protein-like
Solyc01g081060.2	1.74512	0.803323	0.0105821	Xyloglucan endotransglucosylase/hydrolase 14
Solyc05g015840.2	1.74166	0.800459	0.00119827	Squamosa promoter-binding protein
Solyc10g047040.1	1.74088	0.799813	0.0285817	Zinc finger protein zfs1
Solyc07g056480.2	1.73878	0.798079	0.000254238	Glutathione S-transferase-like protein
Solyc07g062500.2	1.73107	0.791667	0.000391534	Cytochrome P450
Solyc04g079600.2	1.7307	0.791353	0.0125355	Myb family transcription factor-like
Solyc02g080260.2	1.72737	0.788578	0.00205072	Homeobox leucine-zipper protein
Solyc08g068110.1	1.72705	0.788307	0.0152251	DEAD box helicase
Solyc02g022850.1	1.72093	0.783189	0.00629139	FAD-binding domain-containing protein
Solyc11g021060.1	1.7184	0.781069	1.42661e-10	Proteinase inhibitor
Solyc12g044950.1	1.71836	0.781033	0.0133481	Omega-6 fatty acid desaturase
Solyc02g080330.2	1.71598	0.779032	2.07327e-06	Cytochrome P450
Solyc06g052020.2	1.71466	0.777926	0.0473526	Unknown Protein
Solyc07g063750.2	1.71299	0.776518	0.043823	Serine/threonine-protein kinase receptor
Solyc08g076370.2	1.71209	0.775759	0.00246797	Homeobox-leucine zipper protein ATHB-9
Solyc02g062460.2	1.70982	0.773848	0.0079261	2-oxoglutarate-dependent dioxygenase
Solyc01g006540.2	1.70637	0.77093	0.00122755	Lipoxygenase
Solyc11g066580.1	1.70353	0.768528	0.00465141	Cytochrome P450
Solyc05g008300.1	1.69901	0.764696	9.62317e-07	Unknown Protein
Solyc09g074550.2	1.69691	0.762907	0.014933	UPF0497 membrane protein 6
Solyc08g075450.2	1.69639	0.762464	0.0207889	Nodulin-like protein
Solyc03g117210.2	1.69422	0.760624	0.0144442	Unknown Protein
Solyc06g059710.2	1.69036	0.75733	0.0128186	Stearoyl-acyl carrier protein desaturase
Solyc08g005670.2	1.69032	0.757299	0.00821991	Ent-kaurene synthase
Solyc06g083900.2	1.69017	0.757172	0.0284983	Myb-related transcription factor
Solyc12g045030.1	1.68917	0.756319	0.00403758	Short-chain dehydrogenase/reductase family protein
Solyc04g063370.1	1.68752	0.754905	7.83107e-06	Receptor-like kinase
Solyc07g054430.2	1.68648	0.754015	6.32084e-05	Glutamate formiminotransferase
Solyc06g074260.2	1.68354	0.751502	2.95461e-06	Genomic DNA chromosome 5 P1 clone MWD9
Solyc04g078710.1	1.68324	0.751242	0.00775101	Subtilisin-like protease
Solyc00g156980.2	1.68181	0.750011	0.000916309	Choline dehydrogenase
Solyc05g006870.2	1.67507	0.744218	2.6624e-05	Thioredoxin H
Solyc05g052030.1	1.67498	0.744145	0.00205665	Ethylene responsive transcription factor 1a
Solyc01g080900.2	1.67401	0.743306	8.41257e-07	Cytochrome P450
Solyc08g076820.2	1.66822	0.738311	1.78363e-07	BHLH transcription factor
Solyc05g051290.2	1.66821	0.738302	0.00268931	High mobility group family
Solyc02g094400.2	1.65527	0.727067	3.67166e-05	Glycerophosphodiester phosphodiesterase gde1
Solyc08g082670.2	1.65469	0.72656	1.39257e-05	Cellulose synthase
Solyc05g005870.2	1.6531	0.725172	0.0421296	Nodulin MtN21 family protein
Solyc03g080190.2	1.65265	0.72478	0.00530515	Flavanone 3-hydroxylase-like protein
Solyc12g088170.1	1.64891	0.721517	1.29979e-06	Hydroxycinnamoyl CoA quinate transferase
Solyc08g065940.2	1.64791	0.720637	9.5703e-06	Zinc finger CCCH domain-containing protein 20
Solyc12g056920.1	1.64784	0.720573	0.00144987	Sulfate transporter
Solyc01g100750.2	1.64751	0.720289	0.0440256	Susceptibility homeodomain transcription factor
Solyc10g008520.2	1.64665	0.719532	0.0025488	Auxin-responsive GH3-like
Solyc01g098400.2	1.64518	0.718243	6.57081e-12	Histidine phosphotransfer protein
Solyc09g065560.2	1.64396	0.717172	0.000730182	Sulfate transporter
Solyc12g096530.1	1.64223	0.71566	0.00374126	Peroxidase
Solyc05g011890.1	1.63612	0.71028	4.72865e-07	Sulfotransferase family protein
Solyc01g090800.2	1.63595	0.710127	3.42059e-06	Cyclin-dependent kinase
Solyc06g062540.2	1.63565	0.709861	0.013834	Phosphatase
Solyc01g098590.2	1.63412	0.708517	0.0421537	Phosphoglycerate mutase family protein
Solyc08g075240.2	1.63329	0.707782	1.50726e-05	Glucose-methanol-choline oxidoreductase
Solyc01g090890.2	1.63297	0.707497	0.0444182	Xenotropic and polytropic retrovirus receptor
Solyc01g111950.2	1.63043	0.705257	0.0416169	Receptor-like kinase
Solyc09g014350.2	1.62981	0.704702	0.00473471	Glycerol-3-phosphate acyltransferase 6
Solyc09g082690.2	1.62095	0.696842	0.0389439	Early light-induced protein 7
Solyc05g056030.2	1.61877	0.694897	6.63056e-07	Patatin-like protein 3
Solyc03g044090.2	1.6147	0.691268	0.0224881	Phototropic-responsive NPH3 family protein
Solyc11g006250.1	1.6117	0.688581	1.00202e-10	GDSL esterase/lipase At5g33370
Solyc03g026070.2	1.60701	0.684378	0.0289134	Homeobox-leucine zipper protein ATHB-8
Solyc08g082710.2	1.59835	0.676587	2.56688e-05	Protein ABIL1
Solyc09g092260.2	1.59739	0.675714	7.9046e-05	Chaperone protein dnaJ 20
Solyc01g111350.2	1.5959	0.674367	1.18344e-06	Nodulin family protein
Solyc02g071700.2	1.59515	0.673693	3.653e-05	GDSL esterase/lipase At1g29670
Solyc02g062140.2	1.58787	0.667093	4.18996e-07	Armadillo/beta-catenin repeat family protein
Solyc03g115870.2	1.58724	0.66652	5.1604e-08	Thioredoxin 2
Solyc03g007050.2	1.58357	0.663183	2.07331e-06	Receptor like kinase, RLK
Solyc07g006890.1	1.58133	0.661141	0.0341842	Cytochrome P450
Solyc01g108710.2	1.58022	0.660121	2.298e-06	Unknown Protein
Solyc05g006420.2	1.57909	0.659092	0.000228633	Two-component response regulator ARR3
Solyc03g121600.2	1.57775	0.657869	3.0331e-05	Choline dehydrogenase
Solyc12g009110.1	1.57595	0.656222	7.02117e-06	O-methyltransferase-like protein
Solyc11g008260.1	1.57372	0.654175	0.029722	Cysteine proteinase cathepsin F
Solyc03g025320.2	1.57338	0.653866	8.33719e-10	Hydroxycinnamoyl transferase
Solyc12g087870.1	1.57312	0.653628	4.65013e-05	Purine permease family protein
Solyc11g010360.1	1.57106	0.651739	0.0117356	Plant-specific domain TIGR01570 family protein
Solyc01g110340.2	1.56349	0.644767	3.82711e-06	Endoglucanase 1
Solyc02g081980.2	1.55779	0.639499	9.62317e-07	Ectonucleoside triphosphate diphosphohydrolase 6
Solyc12g043030.1	1.55588	0.637729	0.000688812	Sulfate transporter
Solyc11g044940.1	1.55097	0.633174	0.00369623	Pto-like, Serine/threonine kinase protein, resistance protein
Solyc05g007480.1	1.54966	0.631956	0.012696	Phytochrome kinase substrate 1
Solyc01g090460.2	1.54881	0.631164	0.00710434	Homeobox-leucine zipper protein
Solyc04g007820.2	1.54705	0.629523	0.0112147	Major latex-like protein
Solyc04g005700.2	1.54462	0.627248	0.00397738	Major latex-like protein
Solyc08g080040.2	1.54448	0.627118	0.00254291	Anthocyanidin synthase
Solyc03g122190.2	1.544	0.626675	0.00680708	Jasmonate ZIM domain 2
Solyc09g009540.2	1.53988	0.622819	0.00419333	Hydrolase alpha/beta fold family protein
Solyc08g014120.2	1.53888	0.62188	1.40902e-06	BHLH transcription factor
Solyc10g081700.1	1.53583	0.619019	0.0114142	Pollen preferential protein
Solyc03g006400.2	1.53287	0.616234	0.0190113	Protein kinase
Solyc08g080470.2	1.53135	0.6148	9.28785e-09	Calmodulin binding protein
Solyc02g081340.2	1.52866	0.612266	0.00113754	Glutathione S-transferase
Solyc02g078150.2	1.52589	0.609655	4.65013e-05	Plant-specific domain TIGR01615 family protein
Solyc06g069150.1	1.52048	0.604528	0.0180988	Genomic DNA chromosome 3 P1 clone MPE11
Solyc12g094660.1	1.52018	0.604246	0.00373192	Cc-nbs-lrr, resistance protein
Solyc04g008060.2	1.52014	0.604201	1.57462e-11	Vacuolar iron transporter Ccc1
Solyc10g076820.1	1.52013	0.604199	0.00505032	Myb family transcription factor
Solyc08g068390.2	1.52009	0.604157	0.0289897	Fatty acid oxidation complex subunit alpha
Solyc08g075490.2	1.5199	0.603975	1.84609e-05	Carotenoid cleavage dioxygenase 4B
Solyc01g080020.2	1.51874	0.602871	9.13362e-09	Xylanase inhibitor
Solyc02g088340.2	1.51755	0.601749	0.000357117	WRKY transcription factor-c
Solyc08g078520.2	1.5162	0.600462	0.00806737	Os03g0859900 protein
Solyc03g111130.1	1.51204	0.5965	0.00719732	Malate synthase
Solyc12g056930.1	1.51144	0.595921	0.00118937	Sulfate transporter 2
Solyc01g105410.2	1.50855	0.593164	0.00106349	Os06g0220000 protein
Solyc06g072220.1	1.50685	0.591535	0.0463115	Kunitz trypsin inhibitor
Solyc08g082990.2	1.50477	0.589542	0.00621087	Oligopeptide transporter 9
Solyc10g085830.1	1.50313	0.587965	0.00294682	O-methyltransferase 1
Solyc07g018240.1	1.50211	0.586994	0.000476154	Elongation of very long chain fatty acids protein 4
Solyc01g100240.2	1.49951	0.584489	0.0113552	Calmodulin-binding protein
Solyc01g091240.2	1.49937	0.584357	0.0342339	Pentatricopeptide repeat-containing protein
Solyc09g082660.2	1.49832	0.583343	1.20642e-05	Caffeoyl-CoA O-methyltransferase
Solyc12g044840.1	1.49732	0.582385	0.0185828	Receptor-like kinase
Solyc07g018010.2	1.49683	0.581911	0.000150504	Transcription Factor
Solyc08g067940.2	1.49471	0.579864	0.0157953	Unknown Protein
Solyc07g008010.2	1.49417	0.579346	0.0117356	Myb transcription factor
Solyc01g006320.2	1.49319	0.578393	0.00237333	Non-race specific disease resistance protein 1-like protein b
Solyc07g049290.2	1.49274	0.577961	1.68363e-09	Nitrate transporter
Solyc06g005170.2	1.49211	0.577353	0.0425727	Mitogen-activated protein kinase 3
Solyc09g011080.2	1.49199	0.577241	0.0447677	Ribulose-1 5-bisphosphate carboxylase/oxygenase activase 1
Solyc01g088690.2	1.49117	0.576449	0.0276852	ATP binding / serine-threonine kinase
Solyc05g012110.2	1.49103	0.576313	3.08281e-06	6-phosphogluconolactonase
Solyc08g079060.2	1.48962	0.574946	0.00162603	Trehalose 6-phosphate phosphatase
Solyc03g031760.2	1.48718	0.572579	0.00572858	Homeobox-leucine zipper protein ATHB-14
Solyc12g098590.1	1.48647	0.571888	0.00172655	UDP-glucosyltransferase family 1 protein
Solyc01g095580.2	1.48645	0.571873	0.000244204	GH3 family protein
Solyc02g078390.2	1.48604	0.571472	0.0433725	MutS2 protein
Solyc02g064680.2	1.48376	0.56926	0.0361213	Calcium-transporting ATPase 1
Solyc03g096290.2	1.48181	0.567359	2.38739e-07	Aquaporin-like protein
Solyc01g074030.2	1.48036	0.565947	3.9583e-11	Beta-glucosidase 01
Solyc04g005070.2	1.47955	0.565155	9.27942e-06	Peptide transporter
Solyc01g079950.2	1.47562	0.561321	0.00103887	Xylanase inhibitor
Solyc01g109090.2	1.47548	0.561183	0.0433725	Unknown Protein
Solyc02g078750.2	1.4747	0.560426	0.0346245	Receptor protein kinase
Solyc04g072740.2	1.47326	0.559016	9.11481e-05	High affinity sulfate transporter 1
Solyc05g052240.2	1.47195	0.557726	0.0122568	Chalcone--flavonone isomerase
Solyc04g072030.1	1.47118	0.556974	2.20507e-06	Interferon-induced GTP-binding protein Mx
Solyc00g050430.2	1.47103	0.556828	0.0386458	BHLH transcription factor
Solyc10g078530.1	1.47036	0.556174	6.88296e-07	Patatin-like protein 3
Solyc09g092270.2	1.46962	0.555444	0.000846753	Hydroxycinnamoyl-CoA shikimate/quinate hydroxycinnamoyl transferase
Solyc10g083360.1	1.46877	0.554605	0.000163808	Calmodulin binding protein
Solyc03g031600.2	1.4679	0.553755	9.2351e-07	Peroxisomal membrane protein PMP22
Solyc02g092930.1	1.46772	0.55358	0.0059671	MYB transcription factor
Solyc10g086570.2	1.46731	0.55317	1.44238e-05	Palmitoyltransferase PFA4
Solyc02g065240.2	1.46711	0.552977	1.65099e-09	Hydrolase alpha/beta fold family protein
Solyc06g061020.2	1.46512	0.551021	0.0167088	Baculoviral IAP repeat-containing protein 3
Solyc11g066130.1	1.46489	0.550794	2.40828e-09	Thaumatin-like protein
Solyc08g005130.1	1.46468	0.550588	0.0365164	Inositol-tetrakisphosphate 1-kinase 1
Solyc07g053290.2	1.46444	0.550352	0.0003907	BHLH transcription factor
Solyc12g044610.1	1.46337	0.549291	0.0158782	Myb transcription factor
Solyc10g084320.1	1.4632	0.549125	7.88783e-11	Subtilisin-like protease
Solyc07g041720.1	1.46316	0.549089	3.81773e-06	Oxalate oxidase-like germin 171
Solyc03g093400.2	1.46181	0.547758	0.0091026	Solute carrier family 2, facilitated glucose transporter member 5
Solyc03g025190.2	1.46058	0.546542	0.000541013	Multidrug resistance protein mdtK
Solyc02g081600.2	1.45828	0.54427	0.00139032	Zinc transporter protein
Solyc02g068600.2	1.45731	0.543308	0.0146865	Genomic DNA chromosome 5 P1 clone MUK11
Solyc03g093140.2	1.4534	0.539433	0.000188625	MFS family major facilitator transporter glycerol-3-phosphate cation symporter
Solyc09g007710.2	1.45174	0.537781	0.0498342	Tir-nbs-lrr, resistance protein
Solyc03g119060.2	1.45104	0.537085	3.3172e-11	Alpha-dioxygenase 2
Solyc03g098010.2	1.44829	0.534354	0.0267461	Acid phosphatase
Solyc05g047590.2	1.44636	0.532426	5.62757e-07	Pectinesterase
Solyc09g057580.2	1.44617	0.532234	0.0153614	Homology to unknown gene
Solyc01g087780.2	1.44461	0.530681	0.00104346	Subtilisin-like protease
Solyc04g063350.2	1.44366	0.529729	0.0267461	3-methyl-2-oxobutanoate dehydrogenase
Solyc05g009660.2	1.44324	0.529308	0.000227986	BZIP transcription factor
Solyc11g010960.1	1.44135	0.527421	1.49787e-05	Alcohol dehydrogenase
Solyc11g010850.1	1.43981	0.525879	3.30442e-05	1-deoxy-D-xylulose 5-phosphate synthase 2
Solyc08g005680.2	1.43949	0.525563	0.00170343	Undecaprenyl pyrophosphate synthase
Solyc01g100020.2	1.43847	0.524538	0.0252872	Phospholipase D
Solyc07g063610.2	1.43613	0.522189	0.00496257	Dynein light chain 2 cytoplasmic
Solyc10g054910.1	1.43531	0.521364	0.0213499	Peptidyl-prolyl cis-trans isomerase
Solyc03g111120.2	1.43525	0.5213	0.000627714	Malate synthase
Solyc03g120620.2	1.43222	0.51825	0.0177901	Homeobox-leucine zipper protein ATHB-15
Solyc10g086240.1	1.43111	0.517136	8.74841e-05	Glucosyltransferase
Solyc01g109460.2	1.42929	0.515295	0.0157885	Solute carrier family 2, facilitated glucose transporter member 3
Solyc01g095450.2	1.42749	0.513484	1.02115e-05	GDSL esterase/lipase At4g01130
Solyc06g007440.2	1.42744	0.513425	0.00722531	CBL-interacting protein kinase 16
Solyc02g080310.2	1.42601	0.511986	0.048741	Beta-glucosidase 47
Solyc08g007670.1	1.42475	0.510708	0.0329057	Subtilisin-like protease
Solyc02g031710.2	1.42444	0.510394	0.00172655	Protein binding protein
Solyc11g008250.1	1.42321	0.50915	0.0317955	Single-stranded nucleic acid binding R3H domain protein
Solyc03g114950.2	1.42294	0.508872	0.0190175	Lipid a export ATP-binding/permease protein msba
Solyc01g111740.2	1.42203	0.507957	0.00540727	Bzip-like transcription factor-like
Solyc01g091370.2	1.42171	0.50763	0.00033307	AT-hook motif nuclear localized protein 1
Solyc06g068500.2	1.42165	0.50757	0.000707416	Chaperone protein DnaJ 1
Solyc05g050540.2	1.42076	0.506663	0.0186002	Laccase 1a
Solyc04g050440.2	1.41937	0.505247	0.000692505	Ammonium transporter
Solyc07g007620.2	1.41931	0.505195	0.00188125	Processive diacylglycerol glucosyltransferase
Solyc12g056540.1	1.41651	0.502337	0.0197602	Histone H3
Solyc01g096370.2	1.41564	0.501456	0.0361213	BHLH transcription factor
Solyc08g065190.2	1.41449	0.500286	0.000594345	Zinc transporter protein
Solyc04g081240.2	1.41166	0.497388	2.20507e-06	Auxin response factor 5
Solyc03g123590.2	1.41162	0.497353	0.0175591	Remorin family protein
Solyc01g080910.2	1.40945	0.495134	0.021912	Unknown Protein
Solyc02g071820.2	1.40933	0.495012	4.25679e-08	Receptor like kinase, RLK
Solyc11g072990.1	1.40923	0.494903	0.048533	Fatty acid elongase 3-ketoacyl-CoA synthase
Solyc04g077510.2	1.40887	0.494541	0.00677518	Growth regulating factor 1
Solyc04g008110.2	1.40822	0.493871	9.72721e-06	Histidine kinase 2
Solyc03g006240.2	1.40643	0.492033	0.0115173	GDSL esterase/lipase At5g45910
Solyc08g063130.2	1.40621	0.491807	0.00319208	Monooxygenase FAD-binding protein
Solyc01g090260.2	1.40613	0.491735	0.0465438	HEAT repeat family protein expressed
Solyc12g009480.1	1.40595	0.491549	0.00394928	Xenotropic and polytropic retrovirus receptor
Solyc09g097780.2	1.40479	0.490357	0.00193635	Glycine-rich protein
Solyc12g089330.1	1.40426	0.489805	0.0498807	Synaptotagmin
Solyc02g084240.2	1.40397	0.489511	1.7736e-07	H1 histone-like protein
Solyc04g009900.2	1.40361	0.489137	0.000594345	Calcium-dependent protein kinase 2
Solyc04g081590.2	1.40302	0.488533	7.01532e-06	Receptor like kinase, RLK
Solyc02g090310.1	1.40252	0.488024	0.00724166	Dof zinc finger protein 4
Solyc06g060110.2	1.40241	0.487913	4.85662e-05	Amino acid permease
Solyc02g088910.2	1.40128	0.486741	0.0046341	Ninja-family protein 3
Solyc10g007830.1	1.39614	0.481446	0.0241164	LRR receptor-like serine/threonine-protein kinase, RLP
Solyc03g119300.2	1.39457	0.479819	0.0455731	CHY zinc finger containing protein
Solyc03g116900.2	1.39441	0.479652	0.000407644	Manganese transporter MntH
Solyc02g063420.2	1.39425	0.479485	3.93691e-05	Hydroxyproline-rich glycoprotein
Solyc11g010760.1	1.39391	0.479139	0.0293843	UDP-glucosyltransferase
Solyc12g008420.1	1.39377	0.478992	0.0155691	RNA-dependent RNA polymerase family protein
Solyc05g006700.2	1.39176	0.476909	0.000999689	Wall-associated receptor kinase-like 20
Solyc01g104710.2	1.39012	0.47521	0.0256917	Unknown Protein
Solyc06g068140.2	1.3878	0.472805	1.81182e-08	Methyl binding domain protein
Solyc03g112330.2	1.38778	0.472781	0.0371104	U-box domain-containing protein 33
Solyc10g080090.1	1.38689	0.471856	0.0158782	HAT family dimerisation domain containing protein expressed
Solyc10g009410.1	1.386	0.470925	0.0215603	Aspartic proteinase nepenthesin I
Solyc10g083860.1	1.38528	0.470174	0.00218496	UDP-glucosyltransferase family 1 protein
Solyc02g090820.2	1.38419	0.469044	0.00565395	Heat stress transcription factor
Solyc06g082470.2	1.38374	0.468578	0.00837743	Serine/threonine protein kinase
Solyc05g010060.2	1.3835	0.468326	1.66815e-06	Xenotropic and polytropic retrovirus receptor
Solyc03g096840.2	1.38122	0.46594	9.5703e-06	Seed specific protein Bn15D1B
Solyc05g055940.2	1.38053	0.465223	0.000571833	Myb family transcription factor
Solyc01g005000.2	1.37987	0.464531	0.00572058	Glutamate decarboxylase
Solyc04g079050.1	1.37968	0.464334	0.0022234	UDP-glucosyltransferase
Solyc03g113910.2	1.37576	0.460226	1.34354e-05	Gibberellin-regulated protein 2
Solyc09g010940.2	1.37554	0.460003	8.65026e-05	Pyrimidine 5&apos-nucleotidase
Solyc01g007670.2	1.37366	0.458029	0.00483437	30S ribosomal protein S7 chloroplastic
Solyc01g098580.2	1.37284	0.457165	0.014878	Phosphoglycerate mutase family protein
Solyc11g072490.1	1.36833	0.452413	1.39401e-06	Interactor of constitutive active ROPs 3
Solyc01g095700.2	1.36826	0.452347	0.000217361	Abscisic acid receptor PYL8
Solyc01g094810.2	1.36574	0.449685	0.00313679	Ubiquitin-conjugating enzyme
Solyc10g080690.1	1.36416	0.448013	1.65198e-06	Patatin-like protein 3
Solyc01g008600.2	1.36403	0.44788	0.000348732	Zinc finger CCCH domain-containing protein 53
Solyc11g008440.1	1.36305	0.446835	0.0128296	Amino acid transporter
Solyc05g007510.2	1.36228	0.446026	0.00161169	RNA-dependent RNA polymerase
Solyc12g098850.1	1.36009	0.443704	0.00618564	Soluble diacylglycerol acyltransferase
Solyc01g110150.2	1.35875	0.44228	0.0399844	CM0216.450.nc protein
Solyc02g086670.2	1.3586	0.442117	0.00100965	Glycogen synthase kinase
Solyc11g007130.1	1.35813	0.441623	0.0476667	Major facilitator superfamily MFS_1
Solyc01g067660.2	1.35758	0.441038	9.09936e-06	Beta-amylase
Solyc04g077490.2	1.35654	0.439928	3.46621e-05	AP2-like ethylene-responsive transcription factor At1g16060
Solyc12g057060.1	1.35522	0.438523	0.00708356	UDP-glucuronosyltransferase
Solyc03g119080.2	1.3537	0.436903	4.70963e-06	Beta-glucosidase
Solyc12g011010.1	1.35048	0.433475	6.20962e-06	Meiosis 5
Solyc05g005490.2	1.34961	0.432538	0.000234417	Carbonic anhydrase
Solyc08g068150.2	1.34888	0.431763	0.0332635	BURP domain-containing protein
Solyc08g075710.2	1.34815	0.430982	0.00117668	Amino acid permease-like protein
Solyc02g069490.2	1.34799	0.430807	0.000318007	FAD linked oxidase domain protein
Solyc10g005640.2	1.34658	0.4293	0.0060368	Phosphatase 2C family protein
Solyc07g043130.2	1.34638	0.429086	0.0170675	Os12g0117400 protein
Solyc03g007870.2	1.34584	0.428509	0.0023945	Heavy metal-associated domain containing protein expressed
Solyc03g019760.2	1.34505	0.427663	0.00295713	ABC transporter G family member 11
Solyc04g049090.2	1.34483	0.427421	0.000362637	MLO-like protein 17
Solyc06g005500.2	1.34217	0.424572	0.0323907	ATP binding / serine-threonine kinase
Solyc06g076220.2	1.34209	0.424486	4.29023e-05	Expansin-1
Solyc07g055950.2	1.34084	0.423133	0.000690678	Meiosis 5
Solyc05g056300.2	1.33997	0.422205	1.845e-05	Thioredoxin-like protein
Solyc05g005950.2	1.33921	0.421378	0.000196607	Solute carrier family 15 member 4
Solyc02g091700.2	1.33906	0.42122	0.0161189	Hydroxyproline-rich glycoprotein
Solyc11g066300.1	1.33839	0.420498	0.0157953	CRS2-associated factor 2, chloroplastic
Solyc12g009930.1	1.33795	0.420021	0.0341842	UDP-glucuronosyltransferase 1-6
Solyc02g068060.2	1.33792	0.419994	0.00295713	Receptor like kinase, RLK
Solyc12g009200.1	1.33785	0.419913	0.000708831	Chlorophyll a-b binding protein, chloroplastic
Solyc11g012930.1	1.3376	0.419646	8.51665e-06	Nodulin family protein
Solyc07g051820.2	1.33524	0.417095	0.0139344	Cellulose synthase
Solyc04g051660.2	1.33315	0.414839	0.0178944	TPR repeat
Solyc05g005980.2	1.33195	0.413542	0.0425727	Solute carrier family 15 member 4
Solyc05g018510.2	1.33188	0.413459	0.000887916	ABC transporter G family member 32
Solyc04g072450.2	1.33181	0.413385	0.00254548	Unknown Protein
Solyc07g055810.2	1.33168	0.413247	0.000254238	Receptor like kinase, RLK
Solyc07g049560.2	1.32876	0.410084	0.0295748	Tyrosine phosphatase family protein
Solyc06g075360.2	1.32764	0.408864	0.00419333	Senescence-associated protein
Solyc02g077880.2	1.32757	0.408784	0.00063575	Auxin-repressed protein
Solyc03g116680.2	1.32705	0.408227	0.0396566	Methyl binding domain protein
Solyc03g121320.2	1.32701	0.408174	0.0401373	Unknown Protein
Solyc06g075930.1	1.326	0.40708	0.00458686	Histone H4
Solyc04g054740.2	1.32589	0.406966	0.00113374	Inositol-3-phosphate synthase
Solyc08g076060.2	1.32528	0.406297	0.0198379	Serine/threonine kinase receptor
Solyc01g112080.2	1.32325	0.404089	0.00029693	LysM-domain GPI-anchored protein
Solyc03g116590.2	1.32298	0.403791	0.000238166	Embryo-specific 3
Solyc12g099900.1	1.32121	0.401859	0.0204499	GRAS family transcription factor
Solyc10g079600.1	1.32061	0.401199	0.0158254	Response regulator 6
Solyc04g007110.2	1.31992	0.400449	0.021121	Genomic DNA chromosome 3 TAC clone K13N2
Solyc03g121920.2	1.31871	0.399124	0.0189932	Mitochondrial carrier-like protein
Solyc07g066010.2	1.31861	0.399019	0.00544461	Amino acid permease
Solyc12g043040.1	1.31795	0.398298	0.0261974	Sulfate transporter
Solyc08g005650.2	1.31778	0.398113	8.53481e-05	Cytochrome P450
Solyc01g102700.2	1.31562	0.395747	0.0194969	Receptor like kinase, RLK
Solyc07g043390.2	1.31525	0.395337	0.00353439	Cellulose synthase family protein expressed
Solyc05g009720.2	1.3143	0.394299	0.0298552	Myb family transcription factor-like
Solyc03g119760.2	1.31411	0.394081	0.00108459	Baculoviral IAP repeat-containing 4 (Predicted)
Solyc03g114240.2	1.31225	0.392047	0.00680717	BURP domain-containing protein
Solyc04g078390.1	1.31177	0.391515	1.88886e-05	F-box protein
Solyc09g075140.2	1.3114	0.391104	0.0015652	Lipase-like protein
Solyc02g083250.2	1.30925	0.388741	0.0103282	Cellular retinaldehyde-binding/triple function C-terminal
Solyc08g060920.2	1.30811	0.387481	0.00841234	Xenotropic and polytropic retrovirus receptor
Solyc11g071850.1	1.30678	0.386012	0.0019479	AT5G22070 protein
Solyc04g007730.2	1.30657	0.385784	0.0223659	Unknown Protein
Solyc08g065430.2	1.30546	0.384554	0.0239776	N-myc downstream regulated protein 3
Solyc07g016180.2	1.3054	0.384495	0.000166689	Auxin response factor 19
Solyc01g010760.2	1.30491	0.383946	0.00941564	Porin/voltage-dependent anion-selective channel protein
Solyc03g005820.2	1.3042	0.383163	0.00338508	Purine permease family protein
Solyc08g077560.2	1.30414	0.383095	0.0253728	ATP binding / serine-threonine kinase
Solyc02g080610.2	1.30253	0.381314	0.0425727	Ankyrin repeat domain-containing protein 13C-A
Solyc08g005580.2	1.30158	0.380258	0.00192002	ABC transporter G family member 14
Solyc01g096480.2	1.30108	0.37971	0.0224881	Thioredoxin protein
Solyc11g009080.1	1.30042	0.378974	2.82089e-05	Phospho-2-dehydro-3-deoxyheptonate aldolase 1
Solyc04g078420.1	1.30013	0.378653	0.00408848	MYB transcription factor
Solyc01g107730.2	1.29953	0.377985	0.0272684	Cyclin
Solyc03g007260.2	1.29887	0.377259	0.0277906	Cyclic nucleotide-gated ion channel 1
Solyc06g072110.2	1.2987	0.377065	0.00727417	Tex2 protein
Solyc11g006590.1	1.29817	0.37648	0.0267461	Cytochrome P450
Solyc01g005440.2	1.29808	0.376384	0.00187632	Jasmonate ZIM-domain protein 3
Solyc07g055180.2	1.29808	0.376378	0.0395997	Receptor protein kinase-like protein
Solyc09g009770.2	1.29606	0.374135	0.00387279	Calmodulin binding protein
Solyc03g006970.1	1.29505	0.373003	0.0158782	Subtilisin-like protease
Solyc01g107890.2	1.295	0.372954	0.00458746	Filament-like plant protein
Solyc02g092480.2	1.29491	0.372849	0.00201999	Phototropic-responsive NPH3 family protein
Solyc07g006110.2	1.2947	0.372623	0.025217	Receptor like kinase, RLK
Solyc06g082010.2	1.29377	0.371582	0.00996333	Zinc finger CCCH domain-containing protein 66
Solyc06g069790.2	1.29331	0.371065	0.000946626	Gibberellin-regulated protein
Solyc03g114850.2	1.29224	0.369877	0.00491923	Squamosa promoter binding protein 3
Solyc06g073320.2	1.29201	0.369613	1.73077e-06	GDP-L-galactose phosphorylase 1
Solyc10g085100.1	1.29186	0.369449	0.00686938	Glycosyl transferase group 1 family protein
Solyc04g081370.2	1.29171	0.369287	0.0330237	Transcription factor
Solyc03g005030.2	1.29033	0.367745	0.00277208	Unknown Protein
Solyc07g017220.2	1.28885	0.366084	0.00360706	Os10g0422600 protein
Solyc03g123560.2	1.28816	0.365316	0.000922049	Chaperone protein dnaJ
Solyc02g093050.2	1.28775	0.364847	0.0324745	WRKY transcription factor 26
Solyc01g058260.2	1.28649	0.363438	0.015481	Poly(A) polymerase
Solyc02g064940.1	1.28558	0.362423	0.0111081	LRR receptor-like serine/threonine-protein kinase, RLP
Solyc04g076860.2	1.28497	0.361732	0.0475018	Inter-alpha-trypsin inhibitor heavy chain H2
Solyc03g065250.2	1.2842	0.360874	0.0353202	CER1
Solyc07g052980.2	1.28381	0.360433	0.00042572	Xyloglucan endotransglucosylase/hydrolase 5
Solyc05g055440.1	1.28257	0.359033	0.000542986	Histone H2B
Solyc12g096190.1	1.28211	0.358524	0.00205072	Tryptophan synthase beta chain
Solyc12g008410.1	1.28148	0.35781	0.00202385	RNA-dependent RNA polymerase family protein
Solyc02g070000.2	1.28049	0.3567	0.00146836	Receptor like kinase, RLK
Solyc11g020280.1	1.2802	0.356371	0.00190259	Receptor like kinase, RLK
Solyc05g008290.2	1.27992	0.356057	0.00203382	Bilirubin oxidase
Solyc01g006400.2	1.27983	0.355956	0.00160854	Cysteine-rich extensin-like protein-4
Solyc12g055940.1	1.27642	0.352106	0.0320891	Unknown Protein
Solyc04g072240.2	1.27609	0.351735	0.000250599	Oxidoreductase family protein
Solyc12g094380.1	1.27441	0.349834	0.037232	DSBA oxidoreductase
Solyc05g009270.2	1.2742	0.349593	0.00518366	Fatty acid elongase 3-ketoacyl-CoA synthase
Solyc07g064160.2	1.27405	0.349424	0.00702363	Thiazole biosynthetic enzyme
Solyc04g007070.2	1.27394	0.349299	0.000978558	Cc-nbs-lrr, resistance protein
Solyc03g118410.2	1.27389	0.349237	0.000416412	Acyl carrier protein
Solyc06g073090.2	1.27339	0.348679	8.40151e-05	Ribosomal subunit interface protein
Solyc09g064660.2	1.27207	0.347181	0.0113806	Small nuclear ribonucleoprotein Sm D1
Solyc10g005330.2	1.27129	0.346298	0.0447028	Homeobox-leucine zipper protein ATHB-14
Solyc06g074730.2	1.27008	0.344922	0.0390635	ARGONAUTE 1
Solyc05g054190.2	1.26978	0.34458	0.00729694	UPF0497 membrane protein 12
Solyc02g080510.1	1.26974	0.34453	0.0304684	Arabidopsis thaliana genomic DNA chromosome 5 P1 clone MOK16
Solyc04g050730.2	1.26946	0.344212	0.0196102	GDSL esterase/lipase At5g33370
Solyc11g040340.1	1.26878	0.343439	0.0279183	Endoglucanase 1
Solyc01g073700.2	1.26878	0.343438	0.0271352	26S protease regulatory subunit 8 homolog
Solyc09g083380.2	1.26657	0.340929	0.00911873	Histone H1
Solyc11g072110.1	1.26652	0.340875	0.00338508	1-AMINOCYCLOPROPANE-1-CARBOXYLATE OXIDASE-like protein
Solyc04g077050.2	1.26646	0.340802	0.00123918	Amino acid permease 6
Solyc01g087040.2	1.2647	0.338798	0.00804095	Thylakoid lumenal 19 kDa protein, chloroplastic
Solyc01g058390.2	1.26469	0.338787	0.00143844	Galactokinase
Solyc01g099600.2	1.26277	0.336589	0.0284937	Copper chaperone
Solyc05g054620.2	1.26233	0.336091	0.0241164	Amino acid binding protein
Solyc04g007890.2	1.26196	0.335662	0.000496722	High mobility group protein
Solyc06g071820.2	1.26184	0.335529	0.000391534	Speckle-type poz protein
Solyc06g074390.2	1.26138	0.335001	0.0422715	Fatty acyl coA reductase
Solyc09g008940.2	1.26116	0.334753	0.0193133	AT-hook motif nuclear localized protein 1
Solyc04g082970.2	1.26053	0.334034	0.0247522	Os03g0859900 protein
Solyc06g074790.1	1.26027	0.333728	0.00222295	Histone H2B
Solyc09g090070.1	1.26009	0.333523	0.0447677	Inorganic phosphate transporter
Solyc03g115200.2	1.2596	0.33297	0.000118153	Glucan endo-1 3-beta-glucosidase 1
Solyc01g111600.2	1.25947	0.332816	8.07413e-05	Metal ion binding protein
Solyc07g052400.2	1.25936	0.332695	0.00341519	Glutamate-gated kainate-type ion channel receptor subunit GluR5
Solyc07g047850.2	1.25903	0.332308	4.96643e-06	Chlorophyll a-b binding protein 4, chloroplastic
Solyc10g055240.1	1.25885	0.332103	0.00742502	Phosphatidylinositol-specific phospholipase c
Solyc09g090430.2	1.25859	0.331808	0.0147441	Cyanate hydratase
Solyc02g062780.2	1.25734	0.33038	0.00821706	Chromodomain-helicase-DNA-binding protein 6
Solyc01g091630.2	1.25728	0.330309	0.0203661	Homeobox-leucine zipper protein ATHB-9
Solyc07g042580.2	1.25645	0.329348	0.0312299	Microtubule-associated protein TORTIFOLIA1
Solyc11g062410.1	1.25539	0.328139	0.0134175	CBL-interacting protein kinase 18
Solyc09g015080.2	1.25531	0.32804	0.00540727	Phosphatidylinositol transfer protein SFH5
Solyc04g072810.2	1.25462	0.327255	0.00566878	CRAL/TRIO domain containing protein expressed
Solyc09g090510.2	1.25381	0.326314	0.0296309	Cyclopropane-fatty-acyl-phospholipid synthase
Solyc01g073680.2	1.25284	0.325204	0.0425727	Non-specific lipid-transfer protein
Solyc01g109880.2	1.25278	0.325136	0.00142281	BZIP transcription factor
Solyc01g110060.2	1.25268	0.32502	0.0118869	Purple acid phosphatase
Solyc09g091510.2	1.25156	0.323722	0.0471741	Chalcone synthase
Solyc02g091920.2	1.25117	0.323275	0.00680717	Xyloglucan endotransglucosylase/hydrolase 2
Solyc07g022900.2	1.25101	0.323091	0.00105333	Chlorophyll a-b binding protein 4, chloroplastic
Solyc01g087890.2	1.24972	0.3216	0.029273	Choline transporter-like protein 5-A
Solyc09g008320.2	1.24925	0.321059	0.000214871	Xyloglucan endotransglucosylase/hydrolase 12
Solyc06g076820.1	1.24912	0.320909	0.000519973	Transcription factor
Solyc05g013220.2	1.24825	0.319903	0.0136525	Fatty acid elongase 3-ketoacyl-CoA synthase
Solyc03g031940.2	1.24818	0.31982	0.0380881	Acyl-CoA synthetase/AMP-acid ligase II
Solyc02g030480.2	1.2467	0.318118	0.0049846	Cinnamyl alcohol dehydrogenase-like protein
Solyc01g107800.2	1.24529	0.316478	0.0267372	Expressed protein
Solyc04g005800.2	1.24522	0.316399	0.0434707	Homeobox-leucine zipper protein
Solyc12g013900.1	1.24503	0.316183	0.000975886	CT099
Solyc04g080290.2	1.2441	0.315106	0.0351511	CRAL/TRIO domain containing protein expressed
Solyc05g009100.2	1.24406	0.315057	0.0359698	Receptor like kinase, RLK
Solyc01g099410.2	1.24269	0.313469	0.00419425	Histone H2A
Solyc03g114150.2	1.24241	0.313146	0.00386327	Aldehyde dehydrogenase
Solyc06g006080.2	1.2422	0.312902	0.000587628	Phosphomethylpyrimidine synthase
Solyc08g075430.2	1.24058	0.31102	0.024944	ABC transporter G family member 14
Solyc01g103590.2	1.23993	0.310255	0.00079942	Glyoxalase/bleomycin resistance protein/dioxygenase
Solyc05g006050.2	1.23843	0.308511	0.0147429	Cyclin D1
Solyc04g078550.2	1.23831	0.308371	0.0215284	WRKY transcription factor 2
Solyc09g007920.2	1.23613	0.305827	0.00368968	Phenylalanine ammonia-lyase
Solyc05g013690.2	1.23605	0.305732	0.00304047	GDSL esterase/lipase At3g26430
Solyc06g073180.2	1.23598	0.305655	0.0117656	Zinc finger protein CONSTANS-LIKE 1
Solyc02g091840.2	1.23546	0.305045	0.000182286	Receptor like kinase, RLK
Solyc01g087500.2	1.23515	0.30469	0.0447028	DNA topoisomerase 2
Solyc11g056680.1	1.23361	0.302884	0.0254528	LRR receptor-like serine/threonine-protein kinase, RLP
Solyc07g005190.2	1.23321	0.302423	0.00928509	Lysosomal Pro-X carboxypeptidase
Solyc11g072320.1	1.23311	0.302301	0.0410218	Something about silencing protein 10
Solyc08g067260.2	1.23216	0.301189	0.0416002	Fatty acid elongase 3-ketoacyl-CoA synthase
Solyc01g091230.2	1.23153	0.300456	0.00146099	Receptor like kinase, RLK
Solyc12g019740.1	1.23071	0.299487	0.0276597	Thioredoxin family protein
Solyc05g007980.2	1.22944	0.298001	0.0276852	High affinity sulfate transporter 2
Solyc01g100230.2	1.22935	0.297901	0.00155553	Chaperone protein dnaJ
Solyc03g119690.1	1.22888	0.297344	0.014878	Aspartic proteinase nepenthesin-1
Solyc09g074470.2	1.22836	0.296738	0.0427273	Kinase interacting family protein
Solyc02g092050.2	1.22733	0.295524	0.0443691	AP2-like ethylene-responsive transcription factor At1g16060
Solyc05g051500.2	1.22669	0.294774	0.0146239	Histone H3
Solyc03g121440.2	1.22597	0.293926	0.0151046	Receptor-like protein kinase At3g21340
Solyc10g074720.1	1.22461	0.292317	0.0273144	Cell division protein kinase 2
Solyc01g096190.2	1.22453	0.292232	0.00480037	Calcium-transporting ATPase
Solyc11g066670.1	1.2238	0.291364	0.0118126	UDP-glucosyltransferase
Solyc09g014300.2	1.22357	0.291097	0.0451295	Glycosyl transferase group 1 family protein
Solyc09g042710.2	1.22344	0.290945	0.0278007	Myosin heavy chain-like
Solyc07g053600.2	1.22332	0.290807	0.0103988	Receptor like kinase, RLK
Solyc01g094700.2	1.22331	0.290784	0.043486	Glycerol-3-phosphate acyltransferase 4
Solyc02g087880.2	1.22324	0.290702	0.0429047	Tubulin alpha-7 chain
Solyc06g063230.2	1.22243	0.289748	0.0284983	Unknown Protein
Solyc01g099650.2	1.22215	0.289424	0.00667114	Formin 3
Solyc12g019480.1	1.22174	0.288932	0.0036281	Formin 3
Solyc09g066100.2	1.22161	0.288788	0.00548145	Histone H1
Solyc02g079760.2	1.22052	0.28749	0.0468822	BHLH transcription factor-like protein
Solyc09g010360.2	1.21949	0.286282	0.0119685	Nodulin-like protein
Solyc02g094420.2	1.21889	0.285565	0.0439558	Shikimate kinase
Solyc04g071800.2	1.21832	0.284895	0.00180526	Cytochrome P450
Solyc10g083790.1	1.21754	0.283973	0.0186489	Cytochrome P450
Solyc01g099840.2	1.21749	0.283908	0.00267745	Auxin-repressed protein
Solyc07g043480.1	1.21656	0.282807	0.0160061	UDP-glucose glucosyltransferase
Solyc12g006460.1	1.21621	0.282392	0.0091026	Cytochrome P450
Solyc06g059800.2	1.21617	0.282342	0.00241103	Protein-P-II uridylyltransferase
Solyc06g065260.2	1.21587	0.281988	0.0125355	Receptor like kinase, RLK
Solyc10g081900.1	1.21437	0.280207	0.0436195	Digalactosyldiacylglycerol synthase 1, chloroplastic
Solyc03g080090.2	1.21411	0.2799	0.025775	NAC domain protein IPR003441
Solyc06g063070.2	1.21312	0.278724	0.000975726	Ethylene responsive transcription factor 2a
Solyc03g071620.1	1.21291	0.278474	0.0120895	Histone H2B
Solyc01g008180.2	1.21116	0.276394	0.0108668	DNA-binding protein
Solyc11g007920.1	1.21101	0.27621	0.0121472	Histone H2B
Solyc01g091620.2	1.2105	0.275605	0.0119685	Glycogen synthase kinase
Solyc09g007360.2	1.21029	0.275357	0.00314488	Interactor of constitutive active ROPs 3
Solyc05g054320.2	1.20942	0.274312	0.027058	Epoxide hydrolase
Solyc01g100040.2	1.20832	0.272997	0.0463131	Integrin-linked kinase-associated serine/threonine phosphatase 2C
Solyc07g041490.1	1.20774	0.272309	0.0151796	Stress responsive alpha-beta barrel domain protein
Solyc06g073730.1	1.20747	0.271992	0.00623317	Ethylene insensitive 3 class transcription factor
Solyc07g065530.1	1.20669	0.271054	0.0176012	Unknown Protein
Solyc04g078880.2	1.20605	0.270287	0.0425727	Genomic DNA chromosome 5 P1 clone MBD2
Solyc04g079560.2	1.20559	0.269735	0.0194969	Lysine/histidine transporter
Solyc05g050980.2	1.20524	0.269319	0.00769046	3-phosphoshikimate 1-carboxyvinyltransferase
Solyc09g091450.2	1.20492	0.268939	0.0341842	DNA polymerase delta subunit 4 family
Solyc04g080580.2	1.20462	0.268573	0.0186407	Kinase PfkB family
Solyc12g008580.1	1.20439	0.268301	0.0399844	Glucan endo-1 3-beta-glucosidase 4
Solyc01g066740.2	1.20354	0.267284	0.0287851	Transducin family protein
Solyc06g073540.2	1.20318	0.266856	0.00728173	Argonaute 4-like protein
Solyc12g005270.1	1.20202	0.265456	0.0298552	Histone H2A
Solyc02g081590.2	1.20189	0.265305	0.0346245	FACT complex subunit SPT16
Solyc11g010170.1	1.20163	0.264995	0.0450424	LanC-like protein 2
Solyc11g012020.1	1.20151	0.26485	0.0402626	EH-domain-containing protein 1
Solyc01g102760.2	1.20113	0.264396	0.0103988	PHD finger family protein
Solyc07g007690.2	1.2008	0.264	0.0276965	Voltage-gated chloride channel
Solyc08g005640.2	1.19977	0.26276	0.0400491	Ent-kaurene synthase-like protein 1
Solyc02g077330.2	1.19948	0.26241	0.0361213	GDSL esterase/lipase At5g45950
Solyc12g013710.1	1.19827	0.260947	0.00330405	Protochlorophyllide reductase
Solyc03g111710.2	1.19812	0.260778	0.00933734	Speckle-type POZ protein
Solyc02g085030.2	1.19639	0.25869	0.00702363	UBA/TS-N domain protein
Solyc02g092980.2	1.19636	0.258651	0.0345116	Cyclin D-like protein
Solyc10g008910.1	1.19526	0.25733	0.011042	Histone H3
Solyc06g084020.2	1.19523	0.257286	0.00249262	Histone H1
Solyc10g054780.1	1.19419	0.256036	0.0167297	Acetyl esterase
Solyc08g063080.2	1.19402	0.255826	0.00900606	UDP-sulfoquinovose synthase
Solyc01g086820.2	1.19352	0.255219	0.0358342	Histone H3
Solyc12g056800.1	1.19183	0.253184	0.0279069	Oxidoreductase family protein
Solyc07g066440.2	1.19123	0.252451	0.0459703	Peptidase trypsin-like serine and cysteine proteases
Solyc06g073740.2	1.19096	0.252121	0.00576949	Beta-D-glucosidase
Solyc02g094280.2	1.19081	0.251943	0.0287851	Oligopeptide transporter
Solyc06g076140.2	1.19077	0.251892	0.0120895	Metallothionein-like protein
Solyc08g013670.2	1.19075	0.251866	0.0338295	Photosystem I reaction center subunit
Solyc09g082500.2	1.19027	0.251292	0.0138589	Tesmin/TSO1-like CXC domain containing protein expressed
Solyc11g011130.1	1.18994	0.250893	0.0239532	THO complex subunit 4
Solyc01g073640.2	1.18969	0.250588	0.0275378	Uncharacterized oxidoreductase Mb1385
Solyc07g053430.2	1.18946	0.250309	0.0298552	Glucan endo-1 3-beta-glucosidase 1
Solyc05g008090.2	1.18946	0.250309	0.0252858	Os02g0200800 protein
Solyc03g032090.1	1.18816	0.248725	0.0396038	Amino acid transporter family protein
Solyc06g007640.2	1.18734	0.247734	0.0167334	FRIGIDA-LIKE 2
Solyc03g005770.1	1.18732	0.247711	0.00727272	Chlorophyll a-b binding protein 3C-like
Solyc06g075830.1	1.1863	0.246467	0.0378735	Histone H4
Solyc03g115900.2	1.18502	0.244913	0.00237674	Chlorophyll a-b binding protein P4, chloroplastic
Solyc07g005390.2	1.18483	0.244676	0.0413452	Aldehyde dehydrogenase
Solyc03g110860.2	1.18483	0.244675	0.0281744	Nuclear transcription factor Y subunit C-1
Solyc10g086220.1	1.18412	0.243813	0.0383611	Flavin oxidoreductase/NADH oxidase
Solyc06g035460.2	1.18353	0.243091	0.00387736	DEAD-box ATP-dependent RNA helicase 7
Solyc09g011810.2	1.18296	0.242397	0.0221778	Fructose-1 6-bisphosphatase class 1
Solyc10g009150.2	1.18294	0.242373	0.0148558	Organ-specific protein S2
Solyc03g116670.2	1.1827	0.242087	0.0147567	TPR domain protein
Solyc05g056000.2	1.18143	0.240531	0.0274339	Lipase-like protein
Solyc02g088350.2	1.18072	0.239673	0.0221254	Genomic DNA chromosome 3 P1 clone MXO21
Solyc03g005760.1	1.18068	0.23962	0.00680717	Chlorophyll a-b binding protein 3C-like
Solyc10g075100.1	1.17983	0.238583	0.0193133	Non-specific lipid-transfer protein
Solyc03g031620.2	1.17945	0.238109	0.0469328	Phosphoadenosine phosphosulfate reductase
Solyc04g015750.2	1.17938	0.238034	0.0136529	Magnesium chelatase H subunit
Solyc12g011450.1	1.1787	0.237192	0.00390742	Chlorophyll a-b binding protein 13, chloroplastic
Solyc12g044330.1	1.1784	0.236833	0.0104815	Aquaporin
Solyc06g005160.2	1.17814	0.236516	0.015481	Ascorbate peroxidase
Solyc04g054190.2	1.17792	0.23624	0.0481383	ABC-1 domain protein
Solyc11g065320.1	1.17538	0.233131	0.0176203	Zinc finger CCCH domain-containing protein 23
Solyc10g006290.2	1.17433	0.231835	0.0180199	Endoribonuclease L-PSP family protein
Solyc12g088670.1	1.17431	0.231816	0.0295748	Cathepsin B-like cysteine proteinase
Solyc07g054850.2	1.17414	0.231601	0.0263838	Uncharacterized GPI-anchored protein At4g28100
Solyc01g088600.2	1.17323	0.230486	0.0471048	PDE320
Solyc06g035450.2	1.17304	0.230253	0.00742502	ATP-dependent RNA helicase
Solyc05g056070.2	1.17256	0.229664	0.0153332	Chlorophyll a-b binding protein 6A, chloroplastic
Solyc09g082780.2	1.17223	0.229261	0.0100936	Asparagine synthetase B
Solyc03g119150.2	1.17201	0.228989	0.0410885	Peptidyl-prolyl cis-trans isomerase
Solyc10g008110.2	1.16976	0.226214	0.0257716	Acyl-CoA oxidase 6
Solyc00g011890.2	1.16967	0.2261	0.0469328	Galactokinase like protein
Solyc07g062190.2	1.1684	0.224535	0.0343399	50S ribosomal protein L13
Solyc04g074580.1	1.16788	0.223895	0.0214151	Histone H3
Solyc12g100160.1	1.16756	0.223495	0.0436065	50S ribosomal protein L6
Solyc03g096850.2	1.1674	0.223293	0.0359073	Genomic DNA chromosome 5 P1 clone MKP11
Solyc05g005480.2	1.16723	0.223092	0.0470505	Oxidoreductase zinc-binding dehydrogenase
Solyc10g005050.2	1.16575	0.221253	0.0275239	Thylakoid membrane phosphoprotein 14 kDa, chloroplastic
Solyc06g074200.2	1.16548	0.220922	0.00572858	Sex-linked protein 9
Solyc12g096500.1	1.16429	0.219447	0.0407772	CONSTANS-like protein
Solyc10g008120.2	1.16311	0.217991	0.0243486	O-methyltransferase 3
Solyc01g056780.2	1.163	0.217848	0.0421296	50S ribosomal protein L34
Solyc10g007600.2	1.16217	0.216827	0.0308712	L-lactate dehydrogenase
Solyc06g071790.2	1.16149	0.215981	0.0342339	Elongation factor Tu
Solyc09g082510.2	1.16114	0.215541	0.0159948	Kinase interacting family protein
Solyc12g035130.1	1.16089	0.215228	0.0158804	ATP dependent RNA helicase
Solyc02g094130.2	1.16028	0.214468	0.0395117	Genomic DNA chromosome 5 P1 clone MJC20
Solyc01g098760.2	1.15866	0.212453	0.0276093	Heavy metal-associated domain containing protein expressed
Solyc05g053240.2	1.15633	0.209558	0.0407841	Squamosa promoter binding protein-like 1
Solyc06g063370.2	1.1531	0.205515	0.0199369	Chlorophyll a-b binding protein 1A, chloroplastic
Solyc01g057830.2	1.15229	0.204505	0.0277906	30S ribosomal protein S1
Solyc09g007560.2	1.15146	0.203469	0.0460824	50S ribosomal protein L5
Solyc06g070980.2	1.15087	0.202719	0.048741	Ubiquitin-conjugating enzyme E2 2
Solyc10g008980.2	1.14973	0.201296	0.0296309	Triose phosphate/phosphate translocator
Solyc10g007690.2	1.13549	0.183315	0.0395997	Chlorophyll a-b binding protein 8, chloroplastic
Solyc11g005330.1	0.904007	-0.145594	0.0440338	Actin
Solyc09g009260.2	0.903687	-0.146104	0.0346245	Fructose-bisphosphate aldolase
Solyc11g011260.1	0.902713	-0.147661	0.0436977	GAI-like protein 1
Solyc04g077020.2	0.902445	-0.14809	0.0389944	Tubulin alpha-3 chain
Solyc01g109540.2	0.902226	-0.14844	0.0388817	Coatomer subunit gamma
Solyc07g005600.2	0.900275	-0.151562	0.0358567	Transmembrane 9 superfamily protein member 4
Solyc04g081490.2	0.89759	-0.155872	0.0346245	Tubulin beta-1 chain
Solyc05g009470.2	0.895685	-0.158937	0.0393615	Alpha-glucosidase
Solyc02g089440.2	0.895375	-0.159435	0.0455374	Glycosyltransferase
Solyc06g071870.2	0.8949	-0.160202	0.049415	60S ribosomal protein L17
Solyc05g006520.2	0.894712	-0.160504	0.0457109	Pyruvate dehydrogenase E1 component alpha subunit
Solyc01g007910.2	0.893115	-0.163083	0.0303632	Succinyl-CoA ligase
Solyc10g007480.2	0.893081	-0.163137	0.0280814	Dtdp-glucose 4 6-dehydratase
Solyc02g087770.2	0.892662	-0.163814	0.048741	Aldose-1-epimerase-like protein
Solyc10g005060.2	0.892599	-0.163916	0.0432269	O-methyltransferase-like protein
Solyc06g066320.2	0.892038	-0.164824	0.0459274	Transcription factor iws1
Solyc05g056580.2	0.890877	-0.166702	0.0194962	Dehydration-responsive family protein
Solyc10g086190.1	0.890431	-0.167424	0.0273144	Adenosine kinase
Solyc05g054260.2	0.889409	-0.169082	0.0495636	Kinesin like protein
Solyc10g081920.1	0.889331	-0.169208	0.0257716	Coatomer subunit beta-1
Solyc03g095490.2	0.888974	-0.169787	0.0367041	Receptor like kinase, RLK
Solyc06g083070.2	0.888433	-0.170665	0.0378092	Fimbrin-like potential actin filament bundling protein
Solyc06g064940.2	0.88815	-0.171125	0.0124376	Phosphatidylinositol transfer protein SFH5
Solyc06g066730.2	0.887534	-0.172126	0.0331409	Coatomer beta&apos subunit
Solyc01g098870.2	0.887495	-0.172189	0.04396	Nucleolar GTPase
Solyc02g087550.2	0.887494	-0.172191	0.0475578	Beta-1,3-galactosyl-O-glycosyl-glycoprotein beta-1,6-N-acetylglucosaminyltransferase 4
Solyc11g068670.1	0.887493	-0.172192	0.0400246	Nicalin
Solyc01g100860.2	0.887149	-0.172751	0.043823	ADP-ribosylation factor
Solyc09g075450.2	0.886876	-0.173195	0.0279396	Fumarate hydratase class II
Solyc03g118020.2	0.886637	-0.173585	0.0106382	Tudor / nuclease domain-containing protein
Solyc03g118040.2	0.885986	-0.174644	0.0125132	Calcium-binding protein Calnexin
Solyc04g055170.2	0.885368	-0.17565	0.0336382	Annexin 2
Solyc01g111170.2	0.884691	-0.176755	0.0332635	Peptidyl-prolyl cis-trans isomerase
Solyc03g118350.2	0.88414	-0.177653	0.0465438	Dual specificity protein phosphatase
Solyc03g120270.2	0.884106	-0.177709	0.0125355	Coatomer beta&apos subunit
Solyc06g019170.2	0.883762	-0.17827	0.0469772	Gamma-glutamyl phosphate reductase
Solyc01g100870.2	0.883068	-0.179404	0.0252872	ADP-ribosylation factor
Solyc01g105680.2	0.881012	-0.182766	0.0330676	Phototropic-responsive NPH3 family protein
Solyc08g080140.2	0.880737	-0.183217	0.0232547	dTDP-4-dehydrorhamnose reductase
Solyc11g008810.1	0.880736	-0.183218	0.0254384	Beta-hexosaminidase b
Solyc07g006640.2	0.880696	-0.183284	0.0423527	ADP-ribosylation factor 3
Solyc09g098240.2	0.880591	-0.183457	0.0108668	Importin-7 (Imp7) (Ran-binding protein 7) (RanBP7)
Solyc07g064800.2	0.88052	-0.183572	0.0285997	Dihydrolipoyllysine-residue succinyltransferase component of 2-oxoglutarate dehydrogenase complex
Solyc06g076410.2	0.880311	-0.183915	0.0442776	Sterol 4-alpha-methyl-oxidase 2
Solyc06g071410.2	0.880197	-0.184101	0.047812	Protein kinase
Solyc01g094940.2	0.879466	-0.1853	0.0214332	Receptor-like protein kinase
Solyc12g043000.1	0.879442	-0.18534	0.010641	Coatomer beta&apos subunit
Solyc06g007320.2	0.879099	-0.185903	0.0207889	Ubiquitin-activating enzyme E1
Solyc12g009960.1	0.878567	-0.186776	0.0223659	Eukaryotic translation initiation factor 4
Solyc07g005730.2	0.8785	-0.186886	0.0217086	Plasma membrane protein 3
Solyc03g121590.2	0.878442	-0.186981	0.0146888	Protein SEY1
Solyc09g075460.2	0.877762	-0.188099	0.0196946	Polygalacturonase-like protein-like
Solyc12g017450.1	0.87756	-0.18843	0.0182404	Cysteine-type endopeptidase/ ubiquitin thiolesterase
Solyc03g123910.2	0.87573	-0.191442	0.0160588	Kelch-like protein 20
Solyc03g007470.2	0.875187	-0.192337	0.0369535	Ubiquitin-conjugating enzyme E2 10
Solyc02g088230.2	0.874981	-0.192677	0.0328207	Xenotropic and polytropic retrovirus receptor
Solyc06g075180.1	0.874868	-0.192862	0.0248135	Ribosomal protein L12
Solyc10g081730.1	0.87421	-0.193947	0.0482642	Os02g0200800 protein
Solyc02g088690.2	0.873515	-0.195096	0.032296	UDP-glucose 6-dehydrogenase
Solyc09g008240.2	0.873202	-0.195613	0.0061753	Uncharacterized ABC transporter ATP-binding protein/permease C9B6.09c
Solyc03g123720.2	0.872728	-0.196396	0.0184826	Protein-O-fucosyltransferase-like protein
Solyc01g103220.2	0.87248	-0.196805	0.0160304	Cytochrome c
Solyc02g081390.2	0.872405	-0.196931	0.0214332	Amine oxidase family protein
Solyc01g089980.2	0.872394	-0.196948	0.0401977	Engulfment and cell motility protein
Solyc06g074110.2	0.872239	-0.197205	0.0382416	Uncharacterized basic helix-loop-helix protein At1g64625
Solyc11g012470.1	0.872127	-0.197389	0.0297081	Heterogeneous nuclear ribonucleoprotein A3
Solyc02g092000.2	0.871628	-0.198216	0.0241164	Unknown Protein
Solyc04g015600.2	0.870764	-0.199647	0.0341842	Receptor like kinase, RLK
Solyc02g083540.2	0.870664	-0.199812	0.0206898	Protein kinase domain containing protein
Solyc03g007760.2	0.870547	-0.200006	0.0225846	Cell division protease ftsH
Solyc10g079120.1	0.870034	-0.200857	0.0482215	Zinc finger CCCH domain-containing protein 30
Solyc11g011020.1	0.868987	-0.202593	0.0160588	Receptor like kinase, RLK
Solyc09g060110.2	0.868719	-0.203038	0.0170098	Pto-like, Serine/threonine kinase protein, resistance protein
Solyc01g102330.2	0.868513	-0.203381	0.0441213	Acetyl xylan esterase A
Solyc04g005080.2	0.86841	-0.203551	0.0244808	Pyruvate dehydrogenase E1 component alpha subunit
Solyc10g007720.2	0.868255	-0.20381	0.0301324	Conserved oligomeric Golgi complex subunit 5
Solyc01g005560.2	0.868186	-0.203923	0.00309587	Isocitrate dehydrogenase
Solyc02g082400.2	0.867649	-0.204817	0.049672	Lysine-specific demethylase 3A
Solyc10g054570.1	0.867525	-0.205023	0.0165944	V-type proton ATPase 16 kDa proteolipid subunit
Solyc07g045350.2	0.867469	-0.205117	0.0286207	Acetyl-CoA C-acetyltransferase protein
Solyc04g078540.2	0.866667	-0.206451	0.023389	Cathepsin B-like cysteine proteinase
Solyc01g087540.2	0.866557	-0.206634	0.00733826	Os01g0611000 protein
Solyc02g082420.2	0.866293	-0.207072	0.0209828	Ring finger protein
Solyc04g056590.2	0.86629	-0.207078	0.0367041	Aspartyl protease family protein
Solyc09g066490.2	0.866174	-0.207272	0.0447507	Adaptin ear-binding coat-associated protein 2
Solyc11g066720.1	0.866121	-0.207359	0.0135262	Bifunctional polymyxin resistance arnA protein
Solyc01g087560.2	0.865715	-0.208037	0.00615676	24-sterol C-methyltransferase
Solyc01g098900.2	0.865704	-0.208055	0.0379309	Yip1 domain-containing protein
Solyc01g088660.2	0.865449	-0.208479	0.0390733	Os04g0585900 protein
Solyc12g095760.1	0.865361	-0.208625	0.00216242	Diphosphate--fructose-6-phosphate 1-phosphotransferase
Solyc09g092390.2	0.864875	-0.209436	0.00525717	Adenosylhomocysteinase
Solyc01g102310.2	0.864325	-0.210354	0.00203267	Unknown Protein
Solyc01g090950.2	0.864157	-0.210635	0.0125355	GRAS family transcription factor
Solyc09g098330.2	0.864103	-0.210725	0.035053	WD-repeat protein-like
Solyc12g007200.1	0.864079	-0.210764	0.0346842	Cell division protein kinase 20
Solyc06g052030.2	0.863712	-0.211378	0.00744658	Importin subunit beta
Solyc04g076790.2	0.861945	-0.214332	0.00901647	Serine hydroxymethyltransferase
Solyc02g080130.2	0.861522	-0.21504	0.0215284	Chaperone dnaj-like protein
Solyc04g005540.2	0.861462	-0.21514	0.0361213	Cc-nbs-lrr, resistance protein
Solyc04g054730.2	0.86142	-0.215211	0.04623	High affinity sulfate transporter 2
Solyc08g029050.2	0.861395	-0.215254	0.0304684	WD-repeat protein
Solyc04g078750.2	0.861315	-0.215388	0.0428704	Harpin-induced protein
Solyc09g015520.2	0.861289	-0.215431	0.0196102	Receptor like kinase, RLK
Solyc07g056550.2	0.860896	-0.216089	0.0417138	Bystin
Solyc04g053120.2	0.860685	-0.216442	0.00295713	4-alpha-glucanotransferase
Solyc10g080940.1	0.860654	-0.216494	0.00165598	Tubulin beta chain
Solyc09g092380.2	0.860413	-0.216898	0.00165614	Adenosylhomocysteinase
Solyc04g082140.2	0.860102	-0.217421	0.00703959	Laccase-22
Solyc10g054080.1	0.859826	-0.217884	0.00966163	Kinesin like protein
Solyc03g005600.2	0.85954	-0.218364	0.00409382	Dehydration-responsive protein-like
Solyc02g038750.2	0.85951	-0.218414	0.0152251	WD repeat-containing protein 55
Solyc03g120890.2	0.859331	-0.218714	0.0239532	GATA transcription factor 9
Solyc02g021420.2	0.858924	-0.219397	0.00180526	Gelsolin
Solyc03g098290.2	0.858641	-0.219873	0.013188	Sucrose synthase
Solyc04g015830.2	0.858553	-0.220021	0.00106428	Actin-binding protein gelsolin
Solyc04g011500.2	0.858422	-0.22024	0.00399989	Actin 4
Solyc01g096670.2	0.85794	-0.221051	0.014171	Cytochrome P450
Solyc01g110380.2	0.857912	-0.221099	0.0289118	Kinesin like protein
Solyc06g082070.2	0.857499	-0.221793	0.0414432	Os06g0207500 protein
Solyc06g082120.2	0.857204	-0.222289	0.0158297	Ran GTPase binding protein
Solyc03g116750.2	0.857082	-0.222494	0.021507	WD-40 repeat protein-like
Solyc01g104070.2	0.857041	-0.222564	0.00480037	Importin beta
Solyc08g074390.2	0.856829	-0.222922	0.0459494	Glucan endo-1 3-beta-glucosidase 6
Solyc05g008340.2	0.856791	-0.222985	0.0371104	Beta-1,3-galactosyl-O-glycosyl-glycoprotein beta-1,6-N-acetylglucosaminyltransferase 7
Solyc04g071360.2	0.856511	-0.223457	0.00496257	Transcription factor
Solyc05g013570.2	0.855674	-0.224867	0.0312299	AT1G67900-like protein
Solyc10g045550.1	0.855215	-0.225641	0.0257716	Ras-related protein Rab-25
Solyc10g085070.1	0.855031	-0.225952	0.0406674	UPF0503 protein At3g09070, chloroplastic
Solyc03g119980.2	0.854925	-0.22613	0.00505032	Lipase-like protein
Solyc07g065880.2	0.854378	-0.227054	0.0345706	Kinesin
Solyc04g054810.2	0.854259	-0.227255	0.00578357	Pollen allergen Phl p 11
Solyc12g006990.1	0.85386	-0.227928	0.00991583	Arf GTPase activating protein
Solyc04g009550.2	0.853409	-0.22869	0.0367041	FGFR1 oncogene partner
Solyc10g078340.1	0.853279	-0.22891	0.00587713	Os03g0364500 protein
Solyc02g082140.2	0.853183	-0.229073	0.0332191	Unknown Protein
Solyc01g104680.2	0.853016	-0.229355	0.0019479	GTP-binding nuclear protein Ran-A1
Solyc02g071320.2	0.852267	-0.230623	0.0087065	Unknown Protein
Solyc08g007970.2	0.852028	-0.231027	0.023962	SKIP interacting protein 24
Solyc04g076190.1	0.85195	-0.231159	0.0019479	Aspartic proteinase nepenthesin-1
Solyc01g009420.2	0.851789	-0.231431	0.00195614	Bifunctional polymyxin resistance arnA protein
Solyc07g007820.2	0.851425	-0.232049	0.0189702	Phosphatidylinositol binding clathrin assembly protein like
Solyc10g079170.1	0.851355	-0.232167	0.0471048	Receptor like kinase, RLK
Solyc06g049050.2	0.851268	-0.232315	0.0390733	Expansin
Solyc09g015530.2	0.850952	-0.232851	0.0161088	Os05g0478200 protein
Solyc07g049660.2	0.850752	-0.23319	0.0189932	Acetyl coenzyme A cis-3-hexen-1-ol acetyl transferase
Solyc08g066750.2	0.850463	-0.23368	0.0281122	Major facilitator superfamily domain containing protein 5
Solyc02g067920.2	0.850118	-0.234266	0.0354647	Abhydrolase domain-containing protein FAM108B1
Solyc12g056640.1	0.849812	-0.234785	0.0103586	Integral membrane protein like
Solyc12g044880.1	0.849628	-0.235096	0.00769046	Beta-galactosidase
Solyc10g006650.2	0.849486	-0.235338	0.0409288	Flavoprotein wrbA
Solyc10g008440.2	0.849378	-0.235521	0.0254384	Expansin B1
Solyc12g095790.1	0.849124	-0.235952	0.00267745	Integral membrane protein like
Solyc05g012450.2	0.849082	-0.236024	0.00589305	Dehydration-responsive family protein
Solyc02g078800.2	0.848635	-0.236785	0.00419333	WD-repeat protein
Solyc08g081480.2	0.848454	-0.237092	0.007362	Polygalacturonase-like protein
Solyc02g078760.1	0.848338	-0.237289	0.0425727	CK25
Solyc05g050770.2	0.848079	-0.237729	0.0231969	Serine carboxypeptidase 1
Solyc08g082820.2	0.848017	-0.237835	0.00023498	Heat shock protein
Solyc09g008840.2	0.847781	-0.238236	0.0080779	Pyruvate kinase
Solyc06g074330.2	0.84738	-0.238919	0.0217947	Hydrolase alpha/beta fold family protein
Solyc07g062260.2	0.847281	-0.239087	0.0254423	BES1/BZR1 homolog protein 4
Solyc04g073990.2	0.847177	-0.239265	0.0245901	Annexin
Solyc04g063230.2	0.847132	-0.239341	0.00944679	Dehydration-responsive family protein
Solyc10g081510.1	0.846997	-0.239571	0.000148742	5-methyltetrahydropteroyltriglutamate--homocysteine methyltransferase
Solyc12g098150.1	0.846178	-0.240966	0.00318817	Voltage-gated potassium channel beta subunit
Solyc09g007810.2	0.8455	-0.242123	0.0125355	Auxin response factor 3
Solyc06g005230.1	0.845169	-0.242689	0.0376758	Pto-like, Serine/threonine kinase protein, resistance protein
Solyc06g065570.2	0.845003	-0.242971	0.0387693	N-acetyltransferase
Solyc01g044360.2	0.844824	-0.243278	0.000384048	Importin beta-3
Solyc03g083770.1	0.843693	-0.24521	0.0298517	Pectinesterase
Solyc01g086970.2	0.843598	-0.245372	0.0344861	Zinc finger A20 and AN1 domain-containing stress-associated protein 6
Solyc06g062580.2	0.843302	-0.245878	0.00152104	Beta-galactosidase
Solyc05g053230.2	0.84327	-0.245933	0.0312299	Serine/threonine protein kinase
Solyc12g044310.1	0.84287	-0.246618	0.00167933	Solute carrier family 15 member 4
Solyc04g082200.2	0.842311	-0.247576	0.0395508	Dehydrin
Solyc01g105280.2	0.841844	-0.248376	0.0254528	Protein phosphatase 2C-like
Solyc06g083580.2	0.841813	-0.248428	0.00483086	Pectate lyase 1-27
Solyc03g115560.2	0.841813	-0.248429	0.00775101	Dimethylaniline monooxygenase-like protein
Solyc07g055930.2	0.841665	-0.248681	0.011857	Glycosyltransferase
Solyc12g096560.1	0.841426	-0.249092	0.00189143	Ectonucleoside triphosphate diphosphohydrolase 6
Solyc02g092790.2	0.841265	-0.249367	0.00180526	Arabinogalactan
Solyc11g010470.1	0.840768	-0.250221	0.0354381	14-3-3 protein beta/alpha
Solyc11g042610.1	0.840669	-0.25039	0.0196102	Ribosomal protein S5
Solyc11g007910.1	0.840592	-0.250522	0.0186489	Neuralized
Solyc11g013490.1	0.840575	-0.250552	0.0239532	Beta-1 3-galactosyltransferase 6
Solyc01g091310.2	0.84055	-0.250594	0.0113806	WD-40 repeat protein
Solyc02g079750.2	0.840444	-0.250776	0.0403921	Flavoprotein wrbA
Solyc10g080100.1	0.840006	-0.251528	0.00187632	Actin-binding protein gelsolin
Solyc06g005810.2	0.839933	-0.251654	0.0400588	Ras-related protein Rab-25
Solyc10g084280.1	0.839736	-0.251992	0.000514894	Calmodulin-binding protein
Solyc05g054680.1	0.839136	-0.253024	0.0239532	Pto-like, Serine/threonine kinase protein, resistance protein
Solyc04g050170.2	0.838674	-0.253818	0.00180526	Receptor like kinase, RLK
Solyc02g086340.2	0.83845	-0.254203	0.00566878	LisH domain and HEAT repeat-containing protein KIAA1468
Solyc09g097890.2	0.838335	-0.254402	0.0116121	Membrane protein
Solyc06g063090.2	0.838221	-0.254597	0.0217086	Alanine aminotransferase
Solyc09g008280.1	0.838068	-0.25486	0.000514894	S-adenosylmethionine synthase
Solyc10g081200.1	0.838031	-0.254924	0.0158782	Ulp1 protease family C-terminal catalytic domain containing protein expressed
Solyc02g094190.2	0.837969	-0.25503	0.0105501	Nodulin family protein
Solyc07g008670.2	0.837662	-0.25556	0.00249262	AT1G74160 protein
Solyc12g055740.1	0.837552	-0.255749	0.0491664	Serine/threonine phosphatase-like protein
Solyc05g053310.2	0.83687	-0.256924	0.00237674	Stress responsive A/B barrel domain family protein
Solyc06g009780.2	0.836222	-0.258041	0.000639415	Kinesin
Solyc01g010130.2	0.836184	-0.258108	0.0278279	Transcription factor
Solyc12g011160.1	0.835272	-0.259681	0.0415432	Enoyl-CoA-hydratase
Solyc08g008290.2	0.835075	-0.260021	0.0285997	Unknown Protein
Solyc02g091210.1	0.834897	-0.260331	0.0321194	Eukaryotic translation initiation factor 5
Solyc06g068400.2	0.83463	-0.260791	0.0180947	60S ribosomal protein L7-like protein
Solyc02g021440.2	0.833952	-0.261964	0.00196234	CBL-interacting protein kinase 04
Solyc04g054980.2	0.833851	-0.262138	0.00572858	Lipoxygenase homology domain-containing protein 1
Solyc12g010520.1	0.833849	-0.262141	0.00204799	Eukaryotic peptide chain release factor subunit 1-1
Solyc01g094690.2	0.833586	-0.262598	0.00165756	Aquaporin
Solyc06g069330.2	0.833512	-0.262726	0.0203786	Serine/threonine protein kinase
Solyc07g049390.1	0.833466	-0.262804	0.0188415	Armadillo/beta-catenin repeat family protein
Solyc03g116330.2	0.832669	-0.264185	0.0206898	Homology to unknown gene
Solyc10g083720.1	0.832578	-0.264342	0.000182286	Pyruvate kinase
Solyc04g078000.2	0.831815	-0.265665	0.0454219	Os02g0794300 protein
Solyc03g083440.2	0.831518	-0.266181	0.00321646	Glutamate synthase
Solyc02g067010.2	0.831178	-0.266771	0.0226935	Guanine nucleotide exchange factor-like protein
Solyc05g053490.2	0.830977	-0.267119	0.0226935	Beta-1,3-galactosyl-O-glycosyl-glycoprotein beta-1,6-N-acetylglucosaminyltransferase 7
Solyc08g082870.2	0.830868	-0.26731	0.0153062	Dehydrogenase/reductase SDR family member 13
Solyc08g080680.2	0.830691	-0.267617	0.021698	Elicitor-responsive protein 3
Solyc08g077350.2	0.830597	-0.267779	0.00435656	HAD-superfamily hydrolase subfamily IA variant 3
Solyc03g093360.2	0.830142	-0.268571	0.000559953	Wound/stress protein
Solyc11g013880.1	0.830019	-0.268784	0.0474422	Receptor-like protein kinase
Solyc03g043660.2	0.829874	-0.269035	0.0050499	Pro-apoptotic serine protease nma111-like protein
Solyc08g082170.2	0.82975	-0.269251	0.0107399	Glycoside hydrolase family 28 protein/polygalacturonase family protein
Solyc12g006490.1	0.829556	-0.269588	0.0281324	Beta-1-3-galactosyl-o-glycosyl-glycoprotein
Solyc06g053840.2	0.829189	-0.270228	0.0100936	Auxin responsive protein
Solyc01g102410.2	0.829102	-0.270378	0.000682192	Glutaminyl-tRNA synthetase
Solyc01g005320.2	0.828977	-0.270596	0.014878	Conserved membrane protein
Solyc02g093850.2	0.828772	-0.270952	0.014275	Ankyrin repeat domain-containing protein 50
Solyc08g029190.2	0.827969	-0.272352	0.0014941	At1g62390-like protein
Solyc01g104770.2	0.827831	-0.272592	0.00525835	Actin
Solyc01g096430.2	0.827062	-0.273933	0.00683369	Predicted NADPH-dependent FMN reductase
Solyc10g044510.1	0.826274	-0.275308	0.0441213	MLO-like protein 4
Solyc10g084690.1	0.826075	-0.275655	0.0257219	ADP-ribosylation factor GTPase activating protein 1
Solyc01g088150.2	0.825606	-0.276474	0.00300326	Glycerol-3-phosphate dehydrogenase-like protein
Solyc07g064080.2	0.825556	-0.276562	0.00436597	Os06g0731950 protein
Solyc03g111770.2	0.825522	-0.276621	0.0120895	Abhydrolase domain-containing protein FAM108B1
Solyc01g103140.2	0.824375	-0.278627	0.00254889	Voltage-gated chloride channel
Solyc12g010790.1	0.823717	-0.27978	0.00369816	Ras-related protein Rab-25
Solyc03g006430.2	0.823238	-0.280619	0.000785775	Os11g0198100 protein
Solyc06g007620.2	0.82207	-0.282667	0.00636518	POT family domain containing protein expressed
Solyc03g114860.2	0.821456	-0.283744	0.0304684	Alpha-1 4-glucan-protein synthase
Solyc08g081420.2	0.821102	-0.284367	0.000543615	Glycosyltransferase-like protein
Solyc03g005690.2	0.820407	-0.285588	0.000534682	Cysteine-rich repeat secretory protein 3
Solyc01g010310.2	0.820193	-0.285965	0.0165968	Glucan endo-1 3-beta-glucosidase 3
Solyc06g007170.2	0.819748	-0.286747	0.0148065	Os06g0207500 protein
Solyc12g009650.1	0.819471	-0.287235	0.00524453	Proline rich protein
Solyc10g085000.1	0.818587	-0.288792	0.00100965	Receptor-like kinase
Solyc06g071990.2	0.818435	-0.28906	0.0471048	AAA-type ATPase family protein
Solyc04g007960.2	0.81821	-0.289457	0.042139	Calcium binding protein Caleosin
Solyc04g080420.2	0.818047	-0.289744	0.0249178	Myrosinase binding protein
Solyc12g009890.1	0.817963	-0.289893	0.00863567	Vacuolar ATPase subunit H protein
Solyc12g056510.1	0.81787	-0.290056	0.00457253	GT-2 factor
Solyc05g047460.2	0.81758	-0.290568	0.00329215	Auxin response factor 19
Solyc01g094890.2	0.817508	-0.290695	0.00338508	Ferric reductase oxidase
Solyc12g007100.1	0.817169	-0.291293	0.00112902	Ankyrin repeat domain-containing protein 1
Solyc02g071310.2	0.81711	-0.291397	0.0135125	Plasma membrane associated protein
Solyc08g079790.1	0.81668	-0.292157	0.00407296	Organic anion transporter
Solyc10g074870.1	0.816419	-0.292619	0.00361093	KH domain containing RNA binding signal transduction associated 1
Solyc04g074230.2	0.816116	-0.293154	8.40151e-05	14-3-3 protein sigma gamma zeta beta/alpha
Solyc01g090970.2	0.815418	-0.294389	0.00832296	Cortical cell-delineating protein
Solyc11g013110.1	0.814168	-0.296602	0.00425813	Anthocyanidin synthase
Solyc02g024000.2	0.814025	-0.296855	0.0129824	WPP domain-associated protein
Solyc01g099630.2	0.813635	-0.297546	0.0042941	Xyloglucan endotransglucosylase/hydrolase 5
Solyc01g080290.2	0.813335	-0.298078	0.049672	Plasma membrane associated protein-like
Solyc05g007220.2	0.812604	-0.299375	0.0215257	Kelch repeat-containing F-box family protein
Solyc08g063000.2	0.812592	-0.299398	0.00103132	Nucleosome assembly protein 1-like protein 2
Solyc00g138060.2	0.81227	-0.299968	0.000535846	2-oxoglutarate-dependent dioxygenase
Solyc04g074730.1	0.812186	-0.300118	0.0164361	Unknown Protein
Solyc12g005220.1	0.812111	-0.30025	0.0395508	TBC1 domain family member 17
Solyc05g055730.2	0.811696	-0.300989	0.000357117	Methylenetetrahydrofolate reductase
Solyc02g078040.2	0.811625	-0.301115	4.58488e-05	Pistil extensin like protein
Solyc06g073190.2	0.811428	-0.301464	0.0019479	Fructokinase-like
Solyc03g111170.2	0.811359	-0.301587	0.00727417	4-coumarate-coa ligase
Solyc12g014600.1	0.811326	-0.301647	0.000420147	Heterogeneous nuclear ribonucleoprotein A3
Solyc02g083490.2	0.811206	-0.30186	0.0389509	Peroxidase
Solyc02g062690.2	0.811076	-0.302091	0.00299422	Transcription factor
Solyc00g007100.2	0.81079	-0.3026	0.00888644	Serine/threonine protein kinase
Solyc01g109580.2	0.81072	-0.302725	0.00173737	Adenylyl cyclase-associated protein
Solyc07g063350.2	0.810673	-0.302808	0.000454628	COP1-Interacting ProteinI 7 (CIP7)
Solyc04g074770.2	0.810439	-0.303225	0.0262553	Unknown Protein
Solyc04g077480.2	0.810082	-0.303859	0.0194345	Transcription factor
Solyc12g009150.1	0.81007	-0.303882	0.0036784	Os12g0554100 protein
Solyc04g074310.2	0.80946	-0.304968	0.00092685	RNA-binding protein 68390-68829
Solyc02g093360.2	0.809131	-0.305555	0.00969878	Ribosomal protein S6 kinase alpha-3
Solyc04g016480.2	0.809127	-0.305562	0.0118243	Calmodulin binding protein
Solyc09g011170.2	0.808412	-0.306838	5.90248e-05	Uncharacterized basic helix-loop-helix protein At1g06150
Solyc02g086930.2	0.807451	-0.308554	0.00286874	Homeobox-leucine zipper-like protein
Solyc04g076030.1	0.804738	-0.31341	0.0127958	Transcription factor/ transcription regulator
Solyc05g015390.2	0.804163	-0.31444	0.0277906	REF-like stress related protein 1
Solyc01g102350.2	0.803464	-0.315694	0.00793108	Pectinacetylesterase like protein
Solyc09g010440.2	0.803277	-0.31603	6.41286e-05	Actin-depolymerizing factor 1
Solyc08g007420.2	0.803273	-0.316037	0.0122719	L-lactate dehydrogenase
Solyc09g091260.2	0.80315	-0.316259	0.000348736	Receptor like kinase, RLK
Solyc12g088050.1	0.803013	-0.316505	0.00216242	Rhamnogalacturonate lyase
Solyc01g086650.2	0.802874	-0.316754	0.00869094	Siroheme synthase
Solyc08g062820.2	0.802409	-0.31759	6.68311e-05	Cytokinin riboside 5&apos;-monophosphate phosphoribohydrolase LOG
Solyc07g005360.2	0.801667	-0.318925	0.00629139	Glycosyltransferase
Solyc09g075970.2	0.801257	-0.319663	0.0265666	CRAL/TRIO domain containing protein expressed
Solyc07g061920.2	0.801087	-0.31997	0.00222944	Glucan synthase like 3
Solyc05g005540.2	0.800322	-0.321347	5.62757e-07	BURP domain-containing protein
Solyc11g010100.1	0.800073	-0.321797	0.0197487	Ras-related protein Rab-25
Solyc09g011750.2	0.800041	-0.321855	3.12825e-05	Receptor-like protein kinase At5g59670
Solyc08g077480.2	0.799943	-0.322031	0.0287851	Os04g0585900 protein
Solyc09g064520.2	0.798903	-0.323908	0.002773	Receptor like kinase, RLK
Solyc07g032740.2	0.798118	-0.325326	0.00101035	Aspartate aminotransferase
Solyc07g052320.2	0.797306	-0.326795	0.000287645	Beta-1 3-galactosyltransferase 6
Solyc05g051570.2	0.797259	-0.32688	0.0387693	Ras-related protein Rab-6A
Solyc02g086940.2	0.797206	-0.326975	0.00106686	FAM179B protein
Solyc08g077060.2	0.797129	-0.327115	0.00151639	Zinc finger protein LSD1
Solyc03g120970.2	0.795855	-0.329422	0.00618824	Gibberellin 2-beta-dioxygenase 2
Solyc01g079980.2	0.795517	-0.330035	0.0242106	Xylanase inhibitor
Solyc01g095530.2	0.795119	-0.330757	0.00582974	Unknown Protein
Solyc07g008560.2	0.794756	-0.331416	0.000946626	Purple acid phosphatase
Solyc11g012360.1	0.794458	-0.331957	0.00202155	Sodium-dependent dicarboxylate transporter
Solyc03g007270.2	0.794123	-0.332565	0.00941564	Protein phosphatase 2C
Solyc06g005560.2	0.794117	-0.332576	5.34797e-05	Expansin-1
Solyc02g087190.1	0.794041	-0.332715	0.00702363	Peroxidase 65
Solyc02g079500.2	0.793839	-0.333081	1.36708e-05	Peroxidase
Solyc01g107340.2	0.792542	-0.33544	6.41286e-05	Unknown Protein
Solyc11g051160.1	0.792445	-0.335618	0.000179993	Phosphatidylinositol transfer protein SFH5
Solyc05g054590.2	0.792439	-0.335628	0.00727417	Bifunctional polymyxin resistance protein ArnA
Solyc04g074290.2	0.791867	-0.336671	0.0387597	Dehydration-responsive protein-like
Solyc09g008780.2	0.791036	-0.338184	0.00295713	Os01g0786800 protein
Solyc01g079850.2	0.790928	-0.338381	0.00330074	Os06g0207500 protein
Solyc07g041230.2	0.790526	-0.339115	0.0454219	Protein Brevis radix-like 4
Solyc07g020790.2	0.789986	-0.340101	0.0311591	D-xylose-proton symporter (D-xylose transporter)
Solyc02g080200.2	0.789279	-0.341393	0.0176012	Pectinesterase
Solyc12g044910.1	0.789196	-0.341544	0.00735638	Coatomer subunit zeta-1
Solyc03g025730.2	0.789127	-0.34167	0.00148055	Tubulin beta chain
Solyc04g008230.2	0.788574	-0.342682	0.000273079	Polygalacturonase
Solyc06g074000.1	0.788557	-0.342712	4.96643e-06	Aspartic proteinase nepenthesin-2
Solyc11g066760.1	0.788232	-0.343308	0.00136227	AP-2 complex subunit alpha
Solyc10g006050.2	0.788007	-0.34372	0.000110879	Heterogeneous nuclear ribonucleoprotein A3
Solyc01g105010.2	0.787218	-0.345165	1.6349e-07	Non-specific lipid-transfer protein
Solyc06g009290.2	0.786776	-0.345976	2.23656e-05	Lipid A export ATP-binding/permease protein msbA
Solyc06g082460.1	0.786247	-0.346946	0.0455731	Plant-specific domain TIGR01568 family protein
Solyc10g050890.1	0.785835	-0.347701	0.00292523	Nitrite reductase
Solyc05g011920.2	0.785526	-0.348269	0.00339567	ACT domain-containing protein
Solyc03g120080.2	0.784615	-0.349942	0.0176012	Periodic tryptophan protein 2
Solyc07g042550.2	0.783999	-0.351076	0.00470485	Sucrose synthase
Solyc07g065110.1	0.783071	-0.352784	0.0197487	Protease inhibitor/seed storage/lipid transfer protein family protein
Solyc04g008200.2	0.780699	-0.357162	0.00253482	Cc-nbs-lrr, resistance protein
Solyc06g065820.2	0.779566	-0.359257	0.0225364	Ethylene-responsive transcription factor 7
Solyc01g065500.2	0.779265	-0.359813	0.00369623	Phosphoribosylanthranilate transferase
Solyc07g062710.2	0.779174	-0.359983	0.000133882	BZIP transcription factor family protein
Solyc01g103510.2	0.777833	-0.362467	9.39237e-06	Ribosomal protein L3-like
Solyc07g065090.1	0.777653	-0.362801	7.07362e-08	Polygalacturonase inhibitor protein
Solyc03g097590.2	0.777292	-0.363472	0.000514894	MtN3-like protein
Solyc07g064670.2	0.77646	-0.365017	3.25998e-05	Beta-1 3-galactosyltransferase 6
Solyc01g094040.2	0.776386	-0.365153	0.0239532	Plastocyanin-like domain containing protein expressed
Solyc07g053350.2	0.776308	-0.3653	4.62251e-05	Os06g0207500 protein
Solyc07g053540.1	0.776138	-0.365615	0.00141343	Fasciclin-like arabinogalactan protein 4
Solyc02g089350.2	0.775934	-0.365995	0.00453779	Gibberellin regulated protein
Solyc02g087870.2	0.77525	-0.367266	0.00129324	Uncharacterized ABC transporter ATP-binding protein/permease C9B6.09c
Solyc06g007240.2	0.773494	-0.370538	0.00159015	BCL-2 binding anthanogene-1
Solyc12g087890.1	0.773147	-0.371185	1.37076e-05	Transcription factor/ transcription regulator
Solyc08g076960.1	0.772726	-0.371971	0.00235609	Abscisic acid receptor PYR1
Solyc04g079860.1	0.771912	-0.373493	0.00703959	Glycosyltransferase family GT8 protein
Solyc07g062590.2	0.771534	-0.374199	0.00987777	Beta-1 3-galactosyltransferase 6
Solyc02g081830.2	0.771344	-0.374553	0.0185641	HAD-superfamily hydrolase
Solyc09g011710.2	0.771124	-0.374965	0.00156698	class I heat shock protein 3
Solyc09g075420.2	0.771024	-0.375152	0.00511649	Ethylene responsive transcription factor 2b
Solyc04g079690.2	0.77097	-0.375254	0.0298552	Receptor-like protein kinase 2
Solyc08g005490.2	0.770281	-0.376544	2.01404e-06	Dehydration-responsive protein-like
Solyc12g042430.1	0.767698	-0.381389	0.00797364	Inositol hexakisphosphate kinase 3
Solyc12g009800.1	0.767695	-0.381394	0.000254238	Purple acid phosphatase 3
Solyc11g012320.1	0.767158	-0.382405	0.000227832	Unknown Protein
Solyc02g086970.2	0.766954	-0.382789	0.00869939	Aldehyde dehydrogenase 1
Solyc10g076510.1	0.766744	-0.383182	0.00155682	Pyruvate decarboxylase
Solyc03g025830.2	0.76629	-0.384037	5.32538e-05	Os03g0107400 protein
Solyc08g077180.2	0.766251	-0.384111	0.00152092	Pyruvate kinase
Solyc04g005060.2	0.766204	-0.384199	0.00132843	F3I6.9 protein
Solyc05g009700.2	0.765979	-0.384623	0.012696	Histidine amino acid transporter
Solyc01g103030.2	0.765753	-0.385049	0.0143054	Nitrate transporter
Solyc11g066320.1	0.765728	-0.385096	0.00218496	Exostosin-like glycosyltransferase
Solyc04g077210.2	0.764609	-0.387206	3.66086e-05	Knotted-like homeobox protein
Solyc01g105720.2	0.76301	-0.390226	0.00189143	Unknown Protein
Solyc08g077290.1	0.761925	-0.39228	0.000303681	DnaJ homolog subfamily C member 2
Solyc01g110660.2	0.760283	-0.395392	0.0396038	Auxin-induced SAUR-like protein
Solyc03g112790.2	0.760135	-0.395672	0.00145804	Genomic DNA chromosome 5 TAC clone K6A12
Solyc01g090990.2	0.759993	-0.395943	0.000272106	Vesicle-associated membrane protein-associated protein
Solyc07g045180.2	0.759615	-0.396659	0.0384076	CONSTANS-like zinc finger protein
Solyc07g048030.2	0.759228	-0.397395	3.77861e-05	Heterogeneous nuclear ribonucleoprotein A3
Solyc04g077780.2	0.757683	-0.400334	3.0606e-06	LIM domain protein
Solyc07g007020.2	0.757589	-0.400512	0.00544461	Receptor-like protein kinase At3g21340
Solyc09g048980.2	0.756226	-0.403111	0.0475426	Phototropic-responsive NPH3 family protein
Solyc09g060090.2	0.756213	-0.403135	0.00020873	SEC14 cytosolic factor family protein
Solyc11g013840.1	0.755667	-0.404178	0.0124135	Exostosin-like glycosyltransferase
Solyc06g008590.2	0.754703	-0.406019	0.00339786	Auxin responsive protein
Solyc02g083720.2	0.754499	-0.406409	0.00313909	MLO-like protein 4
Solyc05g005170.2	0.754157	-0.407064	0.000318007	Polygalacturonase 2
Solyc04g071340.2	0.753327	-0.408653	0.0443691	Fructose-1 6-bisphosphatase class 1
Solyc12g088910.1	0.752881	-0.409505	0.0252872	Unknown Protein
Solyc03g063030.2	0.752198	-0.410816	0.0292236	Amino acid transporter
Solyc09g008480.2	0.751952	-0.411287	1.30225e-07	Phosphatidylinositol-4-phosphate 5-kinase 9
Solyc04g071900.2	0.750465	-0.414143	7.865e-05	Peroxidase
Solyc08g069040.2	0.74839	-0.418138	0.000169741	Peroxidase 1
Solyc02g089700.2	0.748301	-0.41831	0.00180526	Leaf senescence protein-like
Solyc03g114210.2	0.747067	-0.420691	0.000657081	Protein kinase
Solyc08g079080.2	0.746852	-0.421105	0.00100361	Acid beta-fructofuranosidase
Solyc04g078740.2	0.746624	-0.421547	0.000384339	Subtilisin-like protease
Solyc03g120380.2	0.746455	-0.421873	0.0428704	Auxin response factor 9
Solyc03g115640.2	0.745111	-0.424472	6.32084e-05	Os03g0210500 protein
Solyc03g113390.2	0.744839	-0.424999	1.20642e-05	Calcium-dependent protein kinase 1
Solyc05g006510.1	0.74308	-0.428411	0.000104006	Glycosyltransferase family GT8 protein
Solyc03g007740.2	0.742936	-0.42869	8.30688e-09	Reticulon family protein
Solyc01g081540.2	0.742653	-0.429239	5.76317e-06	Myosin XI-F
Solyc03g114000.2	0.742523	-0.429492	7.03543e-06	LIM domain protein
Solyc10g055680.1	0.741643	-0.431203	0.0036784	Ubiquinone/menaquinone biosynthesis methyltransferase ubiE
Solyc04g081890.1	0.741012	-0.432432	0.0292236	Ring H2 finger protein
Solyc12g099360.1	0.739953	-0.434495	0.0295602	Acyl-CoA synthetase/AMP-acid ligase II
Solyc03g121620.1	0.737187	-0.439898	0.00335801	Harpin-induced protein-like
Solyc08g007680.1	0.736712	-0.440827	0.0170098	Subtilisin-like protease
Solyc01g108100.2	0.736683	-0.440883	0.0180199	Unknown Protein
Solyc11g068450.1	0.736155	-0.441918	0.0319204	Biogenesis of lysosome-related organelles complex-1 subunit 1
Solyc06g051800.2	0.73548	-0.443242	5.7235e-07	Expansin
Solyc07g049150.2	0.734493	-0.44518	0.00189143	Ribonuclease III family protein
Solyc06g016790.1	0.733099	-0.44792	0.00113597	Unknown Protein
Solyc10g005100.2	0.732724	-0.448658	0.000318007	Salt stress root protein RS1
Solyc05g051640.2	0.732329	-0.449436	6.63056e-07	Receptor like kinase, RLK
Solyc12g088760.1	0.73205	-0.449986	4.32001e-05	Subtilisin-like protease
Solyc03g120120.2	0.730684	-0.452681	0.0191742	IST1 homolog
Solyc08g066740.2	0.730669	-0.45271	0.000946626	CT099
Solyc04g007490.2	0.730261	-0.453517	3.94246e-05	Cc-nbs-lrr, resistance protein with an R1 specific domain
Solyc06g059740.2	0.729265	-0.455485	0.0306546	Alcohol dehydrogenase 2
Solyc08g078900.1	0.728865	-0.456276	0.0350658	Cortical cell-delineating protein
Solyc05g054770.2	0.728792	-0.45642	0.00610883	Os03g0819700 protein
Solyc11g010730.1	0.728427	-0.457143	0.00522208	Receptor-like kinase
Solyc05g047530.2	0.728379	-0.457239	0.033641	Cytochrome P450
Solyc02g068140.2	0.727641	-0.458702	4.9786e-05	Nodulin-like protein
Solyc02g063430.2	0.726342	-0.461278	1.52391e-05	BHLH transcription factor
Solyc01g108130.2	0.724782	-0.464381	0.03808	B3 domain-containing protein At3g19184
Solyc02g078690.1	0.724504	-0.464935	2.18474e-07	Serine carboxypeptidase K10B2.2
Solyc09g091550.2	0.72375	-0.466436	5.7365e-07	Salicylic acid carboxyl methyltransferase
Solyc01g010970.2	0.723518	-0.4669	0.0196102	ARGONAUTE 1
Solyc04g049920.2	0.723013	-0.467907	4.96392e-05	RNA binding protein-like
Solyc05g014000.2	0.72298	-0.467972	0.00609864	Pectate lyase
Solyc05g051850.2	0.722881	-0.46817	0.000590316	Inositol-3-phosphate synthase
Solyc06g053830.2	0.722623	-0.468685	9.58986e-05	Auxin responsive protein
Solyc11g069470.1	0.722286	-0.469359	8.92681e-09	Class III homeodomain-leucine zipper
Solyc02g091300.2	0.721729	-0.470472	0.0136525	Metal ion binding protein
Solyc12g008590.1	0.72121	-0.471509	0.0131054	Profilin
Solyc08g083220.1	0.720531	-0.472867	9.63284e-06	Unknown Protein
Solyc02g067520.2	0.720284	-0.473362	0.0214511	Unknown Protein
Solyc01g007220.2	0.716932	-0.480091	0.0151046	NHL1
Solyc07g042500.2	0.716403	-0.481156	0.00490536	Abhydrolase domain containing 3
Solyc04g076830.2	0.715598	-0.482778	0.0136525	Phosphoglycerate mutase-like protein
Solyc04g078650.2	0.714406	-0.485185	0.000196003	WUSCHEL-related homeobox-containing protein 4
Solyc02g078160.2	0.711756	-0.490546	0.00978637	Plant-specific domain TIGR01615 family protein
Solyc08g075870.2	0.71123	-0.491612	0.000194999	Dehydration-responsive family protein-like
Solyc09g008860.2	0.710098	-0.49391	4.37059e-08	Receptor like kinase, RLK
Solyc11g007250.1	0.709425	-0.495278	0.00576721	Protein kinase like protein
Solyc10g011730.2	0.707654	-0.498885	1.2351e-05	Arabinogalactan peptide 20
Solyc06g052060.2	0.707637	-0.498919	0.00700756	Unknown Protein
Solyc03g033510.2	0.707144	-0.499923	5.75546e-05	Armadillo/beta-catenin repeat family protein
Solyc03g044720.1	0.705744	-0.502784	0.015481	Pinoresinol-lariciresinol reductase
Solyc07g063390.2	0.705688	-0.502897	0.00174881	Beta-glucosidase
Solyc08g080120.2	0.705682	-0.502909	0.00432099	Homeobox 2 protein
Solyc07g042520.2	0.704951	-0.504406	0.00205072	Sucrose synthase 4
Solyc09g083280.2	0.704208	-0.505927	1.45547e-08	Auxin responsive protein
Solyc04g011670.2	0.703685	-0.506998	0.0306546	BZIP transcription factor
Solyc07g049550.2	0.702959	-0.508487	0.00101873	1-aminocyclopropane-1-carboxylate oxidase
Solyc03g113660.2	0.70292	-0.508567	0.0100936	Unknown Protein
Solyc04g009250.1	0.70272	-0.508979	0.019493	Cc-nbs-lrr, resistance protein
Solyc09g059550.1	0.702023	-0.51041	0.037232	Genomic DNA chromosome 3 P1 clone MJL12
Solyc07g006700.1	0.701277	-0.511944	5.38804e-05	Pathogenesis-related protein PR-1
Solyc07g056160.2	0.699875	-0.514831	0.00703959	Cytochrome P450
Solyc03g006060.2	0.698682	-0.517293	0.0239532	Zinc finger family protein
Solyc10g005810.2	0.697309	-0.520129	0.0138077	Farnesyl pyrophosphate synthase
Solyc02g093310.2	0.697265	-0.520222	1.16155e-05	MAP-like protein kinase
Solyc09g097870.2	0.695894	-0.52306	2.31551e-06	Transcription factor
Solyc02g070530.2	0.695617	-0.523635	0.0026765	Potassium channel
Solyc06g053710.2	0.695264	-0.524367	1.67316e-07	Ethylene receptor
Solyc01g096560.1	0.693624	-0.527775	0.00032052	Subtilisin-like protease
Solyc10g045100.1	0.691026	-0.533188	0.00408848	Phosphoglycerate mutase
Solyc12g011030.1	0.690983	-0.533278	1.00202e-10	Xyloglucan endotransglucosylase/hydrolase 7
Solyc05g051220.2	0.690668	-0.533935	0.00405438	Potassium channel
Solyc11g006990.1	0.690196	-0.534923	1.14165e-07	Os06g0207500 protein
Solyc08g078870.1	0.68971	-0.535937	0.00385542	Proline-rich protein
Solyc10g054030.1	0.689489	-0.536402	0.00180526	AT2G21500 protein
Solyc11g013330.1	0.689139	-0.537134	0.0447507	F2E2.8
Solyc07g048090.1	0.687097	-0.541415	1.04066e-06	Fasciclin-like arabinogalactan protein 2
Solyc12g035400.1	0.685735	-0.544277	0.00354735	MtN21 nodulin protein-like
Solyc08g005960.1	0.685417	-0.544945	0.0175591	Cortical cell-delineating protein
Solyc02g063520.2	0.685137	-0.545535	0.0170098	Homeobox-leucine zipper protein 22
Solyc11g011890.1	0.684974	-0.545878	0.0222177	Zinc finger protein 7
Solyc04g080130.2	0.684439	-0.547007	3.73322e-10	Zinc finger protein
Solyc03g033410.2	0.683347	-0.54931	0.0413212	Ubiquitin-conjugating enzyme E2 10
Solyc02g089160.2	0.682107	-0.55193	0.00858107	Cytochrome P450
Solyc06g076520.1	0.680195	-0.555979	9.58986e-05	class I heat shock protein
Solyc10g080500.1	0.679695	-0.557041	8.28468e-15	Actin
Solyc01g111180.2	0.679612	-0.557218	9.71956e-05	Unknown Protein
Solyc10g076240.1	0.679184	-0.558125	0.0156893	Peroxidase 1
Solyc03g083360.2	0.678074	-0.560486	0.0239922	Pectinesterase
Solyc04g007650.2	0.676418	-0.564013	6.74603e-05	Phosphatidylinositol-4-phosphate 5-kinase family protein
Solyc01g102720.2	0.674194	-0.568765	3.0331e-05	START domain containing 10
Solyc03g116060.2	0.673903	-0.569387	3.55264e-07	Gibberellin-regulated protein
Solyc07g042630.2	0.66925	-0.579384	0.000272106	Beta-Amyrin Synthase
Solyc03g097170.2	0.664673	-0.589283	0.0442776	Cinnamoyl-CoA reductase-like protein
Solyc12g010110.1	0.663338	-0.592184	0.0196242	Formin 2B
Solyc12g008380.1	0.66095	-0.597387	0.021507	Avr9/Cf-9 rapidly elicited protein 146
Solyc11g011210.1	0.660905	-0.597486	0.00092674	Gibberellin regulated protein
Solyc01g110680.2	0.660287	-0.598835	0.000836495	Auxin-induced SAUR-like protein
Solyc06g062690.2	0.659888	-0.599707	0.00886125	Nucleosome assembly protein 1-like protein 4
Solyc01g006550.2	0.659435	-0.600699	0.0205959	LRR receptor-like serine/threonine-protein kinase, RLP
Solyc07g056230.2	0.657837	-0.604197	0.0167334	Cytochrome B561-related protein
Solyc09g064160.2	0.656426	-0.607296	0.0218897	Flavin monooxygenase-like protein
Solyc08g007800.2	0.656258	-0.607664	1.27398e-05	Transporter major facilitator family
Solyc04g054760.2	0.652484	-0.615986	0.0003907	Os10g0422600 protein
Solyc03g117500.1	0.650864	-0.619573	0.0407651	VQ motif-containing protein
Solyc01g100210.2	0.650737	-0.619852	0.0132033	Glycosyltransferase
Solyc02g086460.2	0.6489	-0.623933	6.96247e-07	Unknown Protein
Solyc05g009740.1	0.64749	-0.627071	0.0443085	Nbs-lrr, resistance protein
Solyc12g088930.1	0.646489	-0.629302	0.00572858	Plant-specific domain TIGR01570 family protein
Solyc03g083050.2	0.645119	-0.632363	0.0459274	Unknown Protein
Solyc08g078300.2	0.644772	-0.633138	1.92362e-05	Homeobox-leucine zipper protein
Solyc09g075210.2	0.641797	-0.639812	0.00678289	Late embryogenesis abundant protein 5
Solyc10g039290.1	0.639261	-0.645523	4.50656e-14	Peptide transporter-like protein
Solyc05g006850.2	0.63887	-0.646406	0.00151015	Thioredoxin H
Solyc06g005680.2	0.636604	-0.651532	0.0285997	Transcription factor
Solyc01g097830.2	0.633015	-0.659689	0.00104474	AT5G28150-like protein
Solyc09g091430.2	0.630735	-0.664893	2.56751e-10	Pectate lyase 1-27
Solyc07g053640.1	0.629606	-0.667479	4.7208e-14	Arabinogalactan-protein
Solyc07g008240.2	0.626164	-0.675387	0.00541378	Non-symbiotic hemoglobin protein
Solyc11g012300.1	0.62447	-0.679297	0.0221022	Unknown Protein
Solyc06g050350.2	0.623434	-0.681691	2.79618e-07	Myosin heavy chain-like
Solyc05g054480.2	0.623322	-0.68195	8.07378e-24	Actin
Solyc05g013680.2	0.622143	-0.684681	0.00129324	GDSL esterase/lipase At3g26430
Solyc07g055750.2	0.621922	-0.685194	0.0308712	Strictosidine synthase-like protein
Solyc12g055980.1	0.620954	-0.687441	0.00033307	Endoglucanase 1
Solyc01g110630.2	0.618098	-0.694092	0.0123961	Auxin-induced SAUR-like protein
Solyc08g014350.1	0.617435	-0.695641	0.0221395	TO23-3
Solyc06g074760.1	0.61563	-0.699865	0.0372939	Neuralized
Solyc01g095520.2	0.61209	-0.708183	0.00769046	Arabinogalactan peptide 16
Solyc04g007690.2	0.612014	-0.708365	1.01198e-06	Auxin efflux carrier
Solyc04g054500.2	0.611808	-0.708848	6.44553e-11	Metal ion binding protein
Solyc09g090600.2	0.610267	-0.712487	0.00664658	Acid phosphatase-like protein
Solyc06g060170.2	0.61011	-0.712859	0.00313405	Glycoside hydrolase family 28 protein/polygalacturonase family protein
Solyc01g067940.2	0.607067	-0.720073	0.0363108	Unknown Protein
Solyc09g073030.2	0.605959	-0.722707	0.0262553	Unknown Protein
Solyc12g055970.1	0.602162	-0.731777	1.12401e-14	Endoglucanase 1
Solyc09g082550.2	0.600466	-0.735846	0.000609026	High affinity sulfate transporter 2
Solyc12g009300.1	0.599594	-0.737941	9.28785e-09	Sucrose synthase
Solyc03g120320.1	0.599179	-0.738941	0.0407841	Kelch-like protein
Solyc02g070660.2	0.598394	-0.740833	0.000708831	Membrane protein-like
Solyc04g080650.2	0.598246	-0.741188	0.000494828	Cytochrome P450
Solyc03g080100.2	0.595532	-0.747748	0.000811277	Copper-translocating P-type ATPase
Solyc03g098480.1	0.59472	-0.749716	0.0287851	Unknown Protein
Solyc01g110720.2	0.593925	-0.751647	0.00142256	Auxin-induced SAUR-like protein
Solyc03g118820.2	0.589921	-0.761406	0.0433725	Ras-related protein Rab-25
Solyc10g049580.1	0.586636	-0.769463	2.4926e-10	Unknown Protein
Solyc03g006810.2	0.583259	-0.777792	2.44225e-08	Peroxidase
Solyc02g087860.2	0.582289	-0.780194	0.047067	Transcription factor style2.1
Solyc02g077240.2	0.579376	-0.787428	3.04805e-08	Pyruvate decarboxylase
Solyc11g011710.1	0.579335	-0.787531	0.0135125	Auxin-responsive protein
Solyc02g077610.2	0.57901	-0.788339	0.0409299	NAC domain protein IPR003441
Solyc04g074740.2	0.5783	-0.790109	8.70782e-06	Blue copper-like protein
Solyc09g065890.2	0.57802	-0.790809	7.33967e-06	Lipase
Solyc01g110790.2	0.577863	-0.7912	0.000510187	Auxin-induced SAUR-like protein
Solyc01g028800.1	0.571168	-0.808013	0.0170098	Pumilio-family RNA binding protein
Solyc12g094460.1	0.570469	-0.809781	1.50993e-09	Laccase-2
Solyc09g059240.2	0.56974	-0.811625	0.0217086	Cytochrome P450
Solyc08g008080.1	0.56631	-0.820336	0.045045	RING finger protein
Solyc03g097600.2	0.565359	-0.82276	0.0136034	MtN3-like protein
Solyc09g018720.2	0.563854	-0.826608	0.0367041	Unknown Protein
Solyc03g034100.2	0.563109	-0.828514	5.67395e-05	Plant-specific domain TIGR01568 family protein
Solyc04g077990.2	0.560361	-0.835572	0.000791442	LOB domain protein 38
Solyc01g065700.2	0.56009	-0.836269	2.61574e-05	Integrin-linked kinase-associated serine/threonine phosphatase 2C
Solyc08g075150.2	0.555629	-0.847806	0.00176169	Genomic DNA chromosome 5 TAC clone K9E15
Solyc01g090840.2	0.554534	-0.850651	0.0055245	Cys2/His2 zinc-finger transcription factor
Solyc08g062220.2	0.550493	-0.861205	0.0217086	UDP-glucose glucosyltransferase
Solyc11g012590.1	0.547001	-0.870386	9.07834e-07	UPF0497 membrane protein 12
Solyc10g085090.1	0.545613	-0.874051	0.0153031	Laccase 1a
Solyc04g007350.2	0.543333	-0.880091	0.0231074	Unknown Protein
Solyc07g049400.1	0.542107	-0.88335	0.00124305	Zinc finger family protein
Solyc03g025210.2	0.538144	-0.893935	2.67476e-05	Mate efflux family protein
Solyc11g011190.1	0.535623	-0.90071	9.89431e-09	Exostosin family protein
Solyc04g079520.2	0.535392	-0.901333	0.000229694	Peptide transporter
Solyc08g008660.2	0.533643	-0.906054	0.0181305	NAC domain protein IPR003441
Solyc03g079880.2	0.533105	-0.907508	0.00159015	Protease inhibitor/seed storage/lipid transfer protein family protein
Solyc10g006120.1	0.531553	-0.911713	0.0143989	Extracellular ligand-gated ion channel
Solyc06g007790.1	0.525993	-0.926886	9.13362e-09	Genomic DNA chromosome 3 P1 clone MJL12
Solyc10g007750.1	0.523408	-0.933991	0.033729	Unknown Protein
Solyc12g010800.1	0.522746	-0.935818	9.69404e-08	BZIP transcription factor family protein
Solyc08g015670.2	0.522727	-0.93587	0.0390971	Glucose-1-phosphate adenylyltransferase
Solyc11g006910.1	0.519064	-0.946016	0.0111677	Ferredoxin
Solyc01g099620.2	0.517296	-0.950939	0.000543615	Respiratory burst oxidase-like protein
Solyc05g005550.2	0.515945	-0.95471	0.000208634	BURP domain-containing protein
Solyc12g056160.1	0.50411	-0.988191	0.0102644	Cation/H(+) antiporter 18
Solyc06g008580.2	0.501399	-0.995969	7.45903e-07	Auxin responsive protein
Solyc00g058890.1	0.496319	-1.01066	5.52546e-05	Unknown Protein
Solyc12g010550.1	0.496319	-1.01066	5.52546e-05	Unknown Protein
Solyc01g086910.2	0.493608	-1.01856	0.00818498	Unknown Protein
Solyc07g064180.2	0.491289	-1.02536	0.00124948	Pectinesterase
Solyc04g007800.2	0.485714	-1.04182	0.042139	C2 domain-containing protein
Solyc11g011500.1	0.483974	-1.047	0.0136529	Potassium channel
Solyc08g068160.1	0.483855	-1.04735	5.92002e-05	Monooxygenase
Solyc02g092580.2	0.48075	-1.05664	0.000262148	Peroxidase
Solyc04g072940.2	0.479207	-1.06128	1.68903e-14	Unknown Protein
Solyc12g089380.1	0.477232	-1.06724	0.00387736	Expansin
Solyc02g093070.2	0.475931	-1.07118	0.00136258	2OG-Fe(II) oxygenase
Solyc06g084070.2	0.472481	-1.08167	0.00284125	Auxin responsive protein
Solyc05g014120.1	0.472317	-1.08217	4.30456e-08	Os08g0119500 protein
Solyc05g054090.2	0.47011	-1.08893	2.44831e-05	Unknown Protein
Solyc11g066590.1	0.468683	-1.09331	4.30307e-07	Lysosomal Pro-X carboxypeptidase
Solyc03g013340.2	0.464228	-1.1071	0.00131223	Aquaporin Z transmembrane water channel
Solyc01g097450.2	0.463161	-1.11041	0.0441213	Thioredoxin-like protein 1
Solyc10g005010.2	0.458234	-1.12584	0.0158782	NAC domain protein IPR003441
Solyc08g021820.2	0.449914	-1.15228	0.0111069	Auxin responsive protein
Solyc07g055990.2	0.446078	-1.16463	0.00338508	Xyloglucan endotransglucosylase/hydrolase 7
Solyc04g077220.2	0.442768	-1.17538	0.0125355	Homeobox-leucine zipper protein 22
Solyc02g085380.2	0.44246	-1.17638	0.0229339	Integral membrane protein
Solyc03g033300.1	0.434004	-1.20422	0.0251107	Ammonium transporter
Solyc07g026650.2	0.429847	-1.21811	3.80835e-05	1-aminocyclopropane-1-carboxylate oxidase
Solyc11g012420.1	0.429543	-1.21912	0.00159015	Membrane protein
Solyc03g115710.1	0.424536	-1.23604	0.000640462	Pto-like, Serine/threonine kinase protein, resistance protein
Solyc03g115850.2	0.421053	-1.24793	0.00589712	NAC domain protein IPR003441
Solyc08g081470.2	0.415906	-1.26567	0.00358812	Nitrilase-associated protein
Solyc07g053360.2	0.41452	-1.27049	0.00710259	Seed biotin-containing protein SBP65
Solyc08g066650.2	0.411504	-1.28102	0.0330879	Carotenoid cleavage dioxygenase 8
Solyc01g110730.2	0.4099	-1.28666	0.0157469	Auxin-induced SAUR-like protein
Solyc04g078980.2	0.379661	-1.39722	0.0110741	Glycogenin-like protein
Solyc01g110770.2	0.379241	-1.39882	0.00106349	Auxin-induced SAUR-like protein
Solyc12g043150.1	0.369231	-1.43741	0.00187632	IST1-like protein
Solyc04g080540.2	0.365812	-1.45083	0.00470008	ST225
Solyc01g109390.2	0.356322	-1.48875	0.000179513	PVR3-like protein
Solyc12g057150.1	0.323054	-1.63015	0.00850219	Unknown Protein
Solyc04g077650.2	0.314417	-1.66925	1.50341e-05	Serine carboxypeptidase 1
Solyc05g005830.2	0.310997	-1.68503	0.000552329	Nodulin-like protein
Solyc01g080480.2	0.30597	-1.70854	0.00458686	Endonuclease/exonuclease/phosphatase family protein
Solyc05g005680.2	0.303583	-1.71984	0.000227832	Xyloglucan endotransglucosylase/hydrolase 2
Solyc02g093580.2	0.298692	-1.74327	2.75537e-15	Pectate lyase
Solyc08g078930.1	0.282062	-1.82592	1.36961e-07	Cortical cell-delineating protein
Solyc06g017860.1	0.229541	-2.12318	2.3954e-05	Serine carboxypeptidase
Solyc12g098600.1	0.152542	-2.71272	3.62234e-06	UDP-glucosyltransferase family 1 protein
Solyc12g098870.1	0.148305	-2.75336	1.62155e-10	Lipid A export ATP-binding/permease protein msbA
Solyc02g070080.2	0.130916	-2.93328	5.70559e-06	1-aminocyclopropane-1-carboxylate oxidase 1

## Sheet:  Table S6
Supplementary Table 6. Differentially expressed genes in NIL-WT and NIL-qtph1.1 after treatment with control solution.
Gene ID	FC (NIL-qtph1.1-Control/NIL-WT-Control)	log2FC (NIL-qtph1.1-Control/NIL-WT-Control)	FDR	Function
Solyc05g010110.1	5.24324	2.39046	9.75287e-05	Unknown Protein
Solyc12g044190.1	5.24	2.38957	4.72848e-05	Nbs-lrr, resistance protein
Solyc11g072310.1	3.62602	1.85839	0.000200292	Gibberellin 20-oxidase-3
Solyc06g075440.1	3.04324	1.60561	0.00107756	Peptide transporter
Solyc10g017510.2	2.42857	1.28011	0.035625	Cytochrome P450
Solyc01g068590.2	2.36503	1.24186	0.0346182	Unknown Protein
Solyc06g073080.2	2.31947	1.2138	0.0250144	Flavonol synthase/flavanone 3-hydroxylase
Solyc09g074270.2	2.23659	1.1613	0.0244766	Acetyl esterase
Solyc06g061230.2	2.10703	1.07521	0.00318222	Unknown Protein
Solyc08g007060.2	1.9009	0.926679	8.40069e-13	Peptide transporter-like protein
Solyc09g092260.2	1.88332	0.913277	0.000471509	Chaperone protein dnaJ 20
Solyc08g066880.2	1.85599	0.892193	0.030028	5&apos-methylthioadenosine/S-adenosylhomocysteine nucleosidase
Solyc07g063850.2	1.85304	0.889897	0.0012988	Indole-3-acetic acid-amido synthetase GH3.8
Solyc03g007410.2	1.83607	0.876618	0.0142324	BHLH transcription factor
Solyc03g006490.2	1.77285	0.826071	0.000884759	Aluminum-induced protein-like
Solyc02g078150.2	1.76408	0.81892	0.0324964	Plant-specific domain TIGR01615 family protein
Solyc05g051290.2	1.75862	0.814444	0.0215449	High mobility group family
Solyc06g068500.2	1.68422	0.752081	9.75287e-05	Chaperone protein DnaJ 1
Solyc03g119300.2	1.67554	0.744627	0.0118735	CHY zinc finger containing protein
Solyc07g008010.2	1.66458	0.73516	0.0195707	Myb transcription factor
Solyc03g117590.2	1.63821	0.712118	0.00465678	Chaperone protein dnaJ
Solyc08g082990.2	1.63784	0.711793	0.00251657	Oligopeptide transporter 9
Solyc03g080190.2	1.59833	0.676566	0.0199355	Flavanone 3-hydroxylase-like protein
Solyc02g071820.2	1.59374	0.672419	2.60691e-09	Receptor like kinase, RLK
Solyc09g065630.2	1.57338	0.653868	0.0397762	Protein TIFY 4B
Solyc05g012110.2	1.57087	0.651562	0.00019947	6-phosphogluconolactonase
Solyc01g080900.2	1.54768	0.630107	0.00121998	Cytochrome P450
Solyc01g111350.2	1.5466	0.629103	0.0022195	Nodulin family protein
Solyc03g117680.2	1.54064	0.623526	0.0161171	Transcription regulatory protein SNF5
Solyc04g081240.2	1.52172	0.6057	7.31378e-05	Auxin response factor 5
Solyc08g007240.2	1.49882	0.583832	0.000630183	Hydrolase NUDIX family protein
Solyc01g109090.2	1.48495	0.570413	0.011029	Unknown Protein
Solyc08g065420.2	1.47604	0.561732	0.00177351	BEL1-like homeodomain protein 3
Solyc01g095450.2	1.47477	0.560489	0.000106335	GDSL esterase/lipase At4g01130
Solyc01g080020.2	1.46931	0.555142	0.0482443	Xylanase inhibitor
Solyc10g054440.1	1.45821	0.5442	0.00107756	Arginine decarboxylase
Solyc02g077880.2	1.42206	0.50798	0.00107756	Auxin-repressed protein
Solyc02g078570.2	1.4168	0.502636	0.0408616	Epoxide hydrolase 3
Solyc02g090400.2	1.41642	0.502244	0.0359053	Myb family transcription factor
Solyc11g008440.1	1.41117	0.496888	0.0150934	Amino acid transporter
Solyc01g108910.2	1.40364	0.489169	0.00237525	COSII_At2g15890
Solyc01g098400.2	1.40173	0.487207	0.0352745	Histidine phosphotransfer protein
Solyc01g090880.2	1.39766	0.483014	0.0250144	Holliday junction resolvase
Solyc06g075480.2	1.39336	0.478572	0.0120982	Nitrate transporter
Solyc02g084240.2	1.37642	0.460924	0.0488159	H1 histone-like protein
Solyc09g090510.2	1.35415	0.437385	0.0378208	Cyclopropane-fatty-acyl-phospholipid synthase
Solyc01g104950.2	1.34035	0.422604	0.0352745	Alpha-L-arabinofuranosidase/beta-D-xylosidase
Solyc09g075140.2	1.33431	0.416094	0.0482443	Lipase-like protein
Solyc04g072030.1	1.32087	0.401491	0.0397762	Interferon-induced GTP-binding protein Mx
Solyc10g084320.1	1.30794	0.387295	0.016728	Subtilisin-like protease
Solyc09g082780.2	1.30672	0.385951	0.00465678	Asparagine synthetase B
Solyc02g083310.2	1.30205	0.380782	0.0414914	Wound responsive protein
Solyc11g066950.1	0.930027	-0.104656	0.0254225	Stress responsive A/B barrel domain family protein
Solyc06g073300.1	0.896986	-0.156842	0.0250144	60S ribosomal protein L27
Solyc10g052660.1	0.862035	-0.214182	0.000463265	40S ribosomal protein S25-1
Solyc11g011210.1	0.857916	-0.221092	0.0207148	Gibberellin regulated protein
Solyc06g007220.2	0.841416	-0.249108	0.0132222	Unknown Protein
Solyc03g118040.2	0.833804	-0.26222	0.0195963	Calcium-binding protein Calnexin
Solyc12g008590.1	0.833653	-0.262482	0.00066903	Profilin
Solyc05g054590.2	0.8308	-0.267428	0.0401542	Bifunctional polymyxin resistance protein ArnA
Solyc01g105010.2	0.826052	-0.275695	0.0378208	Non-specific lipid-transfer protein
Solyc06g009630.1	0.81812	-0.289615	0.0482443	CP12
Solyc10g080500.1	0.812258	-0.299991	0.0286746	Actin
Solyc05g056390.2	0.811853	-0.300709	0.0250144	chaperonin
Solyc01g102830.2	0.811076	-0.302091	0.0356431	Unknown Protein
Solyc07g053640.1	0.806052	-0.311056	0.0250144	Arabinogalactan-protein
Solyc02g071020.2	0.803589	-0.315471	0.0474056	Unknown Protein
Solyc03g045110.2	0.798699	-0.324276	0.00483684	40S ribosomal protein S5
Solyc04g081870.2	0.793951	-0.332878	0.00915585	Expansin
Solyc01g110700.2	0.792135	-0.336182	0.0121262	Unknown Protein
Solyc10g011730.2	0.787779	-0.344138	0.00429436	Arabinogalactan peptide 20
Solyc02g063430.2	0.784459	-0.35023	0.0244766	BHLH transcription factor
Solyc01g102720.2	0.774119	-0.369373	0.0482443	START domain containing 10
Solyc05g052140.2	0.767277	-0.382181	0.000463265	ATP synthase subunit delta&apos;, mitochondrial
Solyc09g091550.2	0.76405	-0.388261	0.0195963	Salicylic acid carboxyl methyltransferase
Solyc07g048090.1	0.760301	-0.395357	0.0403467	Fasciclin-like arabinogalactan protein 2
Solyc05g053080.2	0.756022	-0.403499	0.0403467	Unknown Protein
Solyc11g072500.1	0.731621	-0.450831	0.0264912	Dof zinc finger protein 12
Solyc07g064870.2	0.722404	-0.469122	0.00237525	Endoglucanase 1
Solyc08g067330.1	0.714418	-0.48516	0.0190616	Chlorophyll a-b binding protein 3C-like
Solyc11g069700.1	0.704395	-0.505543	0.0047419	Elongation factor 1-alpha
Solyc04g054760.2	0.685336	-0.545118	0.000214124	Os10g0422600 protein
Solyc07g014680.2	0.684325	-0.547247	0.0185615	Potassium transporter
Solyc11g012590.1	0.673688	-0.569849	0.00875764	UPF0497 membrane protein 12
Solyc01g079170.2	0.663919	-0.59092	0.0316271	Galactinol synthase
Solyc01g095520.2	0.626865	-0.673774	0.00378444	Arabinogalactan peptide 16
Solyc10g007820.2	0.626563	-0.674468	0.00922744	Receptor expression enhancing protein 5
Solyc05g014120.1	0.601961	-0.732258	0.0250144	Os08g0119500 protein
Solyc08g068160.1	0.594066	-0.751305	0.0313311	Monooxygenase
Solyc11g011190.1	0.566075	-0.820934	1.15366e-05	Exostosin family protein
Solyc10g006640.2	0.55189	-0.857548	0.00499074	BHLH transcription factor-like protein
Solyc02g079520.1	0.489875	-1.02952	0.0142324	Calcium-binding EF hand family protein
Solyc02g085880.1	0.402597	-1.31259	0.0308213	Cytochrome P450
Solyc01g097450.2	0.329068	-1.60354	0.00280506	Thioredoxin-like protein 1
Solyc04g050820.1	0.328249	-1.60714	0.0199355	Inositol-3-phosphate synthase
Solyc06g017860.1	0.226212	-2.14425	0.000290905	Serine carboxypeptidase
Solyc12g098600.1	0.155709	-2.68307	0.000463265	UDP-glucosyltransferase family 1 protein

## Sheet:  Table S7
Supplementary Table 7. Some traits affected by the qtph1.1 locus.
Population ID	Parent	W1J22a	W1J4	W1J11	W1J13	W1J19	W1P9	W1J26	HP3819	Plant Nb	Ave PHc	SDd	T-test	Ave FWe	SD	T-test	Ave FTf	SD	T-test	Ave NPg	SD	T-test
18N307	17N993-39	1	1	1	1	1	1	1	1	11	137.227	18.9174	0.00165464	13.85	1.83724	0.235197	50.4167	1.31137	0.317409	6	0.426401	0.580727
		1	1	3	3	3	3	3	1	10	113.05	6.36156		12.9173	1.90606		51	1.4771		6.08333	0.288675
18N308	17N1017-74	1	1	1	1	1	1	3	3	11	106.818	8.58858	0.000475795	17.15	3.30413	0.950535	51.5833	1.67649	0.167101	7.08333	0.288675	0.0768598
		1	3	3	3	3	3	3	3	11	92.3182	7.70802		17.2167	1.62135		50.6	1.50555		6.8	0.421637
a Marker score: 1 homozygous for SG-7 alleles; 3 homozygous for TS-165 alleles.
b The number of tomato plants
c Average plant height. Unit, cm
d Standard Deviation
e Average fruit weight. Unit, g
f Average flowering time. Unit, d
g Average node position of the first flower truss
